# Supplementary material for: Responsive organoboranes with dynamic conformation of octacyclophane-type scaffolds: synthesis, AIE and temperature-dependent dual emissions
Source: Royal Society of Chemistry journal article supplement (doi:10.1039/d1tc02713a), 2021-01-01
Supplement: d1tc02713a1.pdf [file d1tc02713a1.pdf]

# Responsive Organoboranes with Dynamic Conformation of Octacyclophane-Type Scaffolds: Synthesis, AIE and Temperature-Dependent Dual Emissions

Kai Zhang,<sup>a</sup> Guangqian Ji,<sup>a</sup> Niu Zhang,<sup>\*b</sup> Nan Wang,<sup>a</sup> Xiaodong Yin,<sup>a</sup> Quansong Li,<sup>a</sup> and Pangkuan Chen<sup>\*a</sup>

<sup>a</sup> Beijing Key Laboratory of Photoelectronic/Electrophotonic Conversion Materials, Key Laboratory of Cluster Science of the Ministry of Education, School of Chemistry and Chemical Engineering, Beijing Institute of Technology of China, Beijing, 102488, China

<sup>b</sup> Analysis & Testing Centre, Beijing Institute of Technology of China, Beijing, 102488, China

## 1. Experimental Section

**Materials and General Methods:** Dibenzosuberone, 4-(diphenylamino)-phenylboronic acid, potassium carbonate, tetrakis(triphenylphosphine)palladium, trifluoroacetic acid, sodium tert-butoxide, stannous chloride, copper(II) bromide, aluminum chloride and iodine were purchased from Energy Chemical. Tetrahydrofuran (THF), dichloromethane, petroleum ether, methanol, and ethyl acetate were purchased from Sinopharm Chemical Reagent Co., Ltd. The chemicals were used without further purification unless otherwise noted. Anhydrous solvent was distilled from commercial solvent with sodium/benzophenone. All commercial chemicals were used without further purification. 3,7-dinitro-dibenzosuberone (**1**), 3,7-diaminodibenzosuberone (**2**), 3,7-dibromo-5-methylene-10,11-dihydro-5H-dibenzo[a,d][7]annulene (**3**), and 2-(4-(dimesitylboranyl)phenyl)-4,4,5,5-tetra-methyl-1,3,2-dioxaborolane were prepared using the similar procedures previously described<sup>[1, 2]</sup>.

400 MHz <sup>1</sup>H, 101 MHz <sup>13</sup>C, and 225 MHz <sup>11</sup>B NMR spectra were recorded on a Bruker spectrometer. <sup>11</sup>B NMR spectra were acquired with boron-free quartz NMR tubes and the spectra were referenced externally to BF<sub>3</sub>·Et<sub>2</sub>O ( $\delta = 0$ ). High resolution mass spectral data were obtained via ESI on an Agilent (Q-TOF 6520) analyzer.

UV-visible absorption spectra were recorded on a Cary 300 UV-Vis spectrophotometer. Luminescent spectra were recorded on an Edinburgh Instruments FLS980. Fluorescent quantum efficiencies were determined using a Hamamatsu C11347-11 Quantaaurus-QY spectrometer.

Electrochemical measurements were conducted on an AUTOLAB-CV-75W analyzer with a scan rate of 100 mV/s. The electrochemical cell was a standard three-compartment cell composed of a glass carbon working electrode, a Pt auxiliary

electrode, and a Pt wire reference electrode. All tests were performed using [Bu<sub>4</sub>N][PF<sub>6</sub>] (0.1 M) as the supporting electrolyte. The voltammograms were obtained in anhydrous and nitrogen saturated CH<sub>2</sub>Cl<sub>2</sub> or THF solutions. The potentials are reported relative to the ferrocene/ferrocenium couple.

X-ray single crystals were obtained on a Bruker D8 X-ray single crystal Venture diffractometer. SAINT5.0 and SADABS programs are used for the reduction and absorption correction of crystal data. The resolution and refinement of the crystal structure are obtained on the SHELXTL-97 software. Using the direct or Patterson methods, all nonhydrogen source coordinates are obtained by using the differential Fourier method and the least square method. Then the geometric method and the difference value are used. The hydrogen atom coordinates were obtained by Fourier method, and the crystal structure was obtained. The CCDC number of 2069496 is deposited.

Femtosecond transient absorption measurements were performed with Ti:sapphire regenerative amplifier (Legend Elite HE+USX-1K-II, 800 nm, 25 fs, 1 kHz). While the second harmonic of the output (330 nm) was used as a pump light. A white-light continuum generated by focusing a fundamental of the regenerative amplifier was used as a probe light (400-1600 nm). The probe light passed through the sample cell was dispersed by a grating and its spectrum was imaged onto a linear image sensor. The transient absorption spectra were recorded as a function of the pump-probe delay.

DFT calculations were performed with the Gaussian 09 program. Geometry optimizations and vertical excitations were calculated by means of hybrid density functional B3LYP and CAM-B3LYP with the basis set of 6-31G\*. The input files and orbital representations were generated with Gaussview 5.0 (scaling radii of 75%, isovalue = 0.02). Excitation data were calculated using TD-DFT (B3LYP/6-311G\*\* and CAM-B3LYP/6-311G\*\*). The resulting structures were confirmed to be stationary points through vibrational frequency analysis.

## 2. Synthetic Procedures

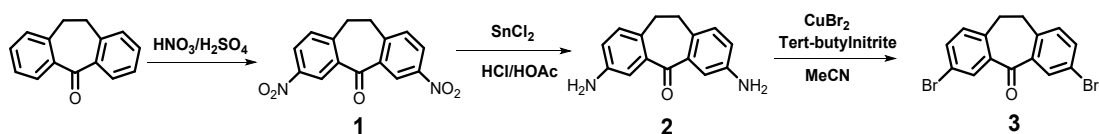

Compounds **1**, **2** and **3** were prepared by previously reported procedures.<sup>[1]</sup>

### 2.1 Synthesis of **4**

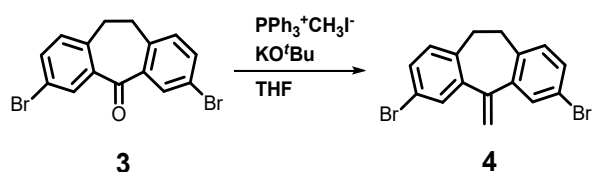

Methyltriphenylphosphonium iodide (0.29 g, 0.72 mmol) was added to a dry Schlenk tube. After deoxygenation by freeze–pump–thawing procedure, dry THF (10 mL) was added via syringe and gave a milky white suspension. At room temperature, KO<sup>t</sup>Bu (80 mg, 0.72 mmol) was then added to the suspension with stirring, and a bright yellow methylenetriphenylphosphorane ylide was generated. After stirring for 20 min, **3** (0.20 g, 0.60 mmol) in THF was slowly added via syringe. The reaction was stirred at 40 °C for 12 h and then filtrated through a flash column of silica gel with CH<sub>2</sub>Cl<sub>2</sub> as eluent to remove unreacted base. The concentrated raw product was further purified via column chromatography on silica gel using petroleum ether (PE) as eluent to give **4** (0.16 g, yield: 80%) as a white powder. <sup>1</sup>H NMR (400 MHz, acetone-d<sub>6</sub>) δ 7.47 (d, *J* = 2.0 Hz, 2H), 7.32 (dd, *J* = 8.0, 2.0 Hz, 2H), 6.98 (d, *J* = 8.0 Hz, 2H), 5.45 (s, 2H), 3.06 (s, 4H). <sup>13</sup>C NMR (101 MHz, CDCl<sub>3</sub>) δ 149.2, 142.3, 137.1, 130.8, 130.7, 130.6, 119.7, 119.1, 32.5. GC-MS (*m/z*): calcd. for C<sub>21</sub>H<sub>12</sub>Br<sub>2</sub>O<sub>2</sub> [M<sup>+</sup>] 363.9, found 363.9.

### 2.2 Synthesis of **5**

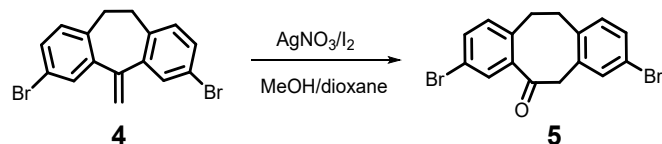

Silver nitrate (0.94 g, 5.53 mmol) was fully dissolved in refluxing methanol (20 mL) in a 100 mL round bottom flask. I<sub>2</sub> (0.35 g, 2.76 mmol) was added together with **4** (0.5 g, 1.37 mmol) in 1, 4-dioxane (20 mL), leading to precipitates of AgI salt immediately. The reaction mixture was refluxed with stirring for 24 h. After cooling to r.t., the solid byproduct was filtered off and the filtrate evaporated under reduced pressure. The crude product was purified by column chromatography on silica gel using

CH<sub>2</sub>Cl<sub>2</sub>/PE (1/3, v/v) as eluent to yield **5** (0.34 g, yield: 65%) as a white powder. <sup>1</sup>H NMR (400 MHz, CDCl<sub>3</sub>) δ 7.53 (d, *J* = 4.0 Hz, 1H), 7.35–7.44 (m, 1H), 7.23–7.14 (m, 2H), 6.97 (d, *J* = 8.0 Hz, 1H), 6.86 (d, *J* = 8.0 Hz, 1H), 4.08 (s, 2H), 3.33–3.10 (m, 4H). <sup>13</sup>C NMR (101 MHz, CDCl<sub>3</sub>) δ 201.9, 140.1, 137.2, 136.4, 135.3, 134.6, 133.4, 132.6, 131.5, 131.1, 130.8, 120.8, 120.4, 77.4, 50.8, 34.0, 33.1. GC-MS (*m/z*): calcd. for C<sub>21</sub>H<sub>12</sub>Br<sub>2</sub>O<sub>2</sub> [M<sup>+</sup>] 379.9, found 379.9.

### 2.3 Synthesis of **6**

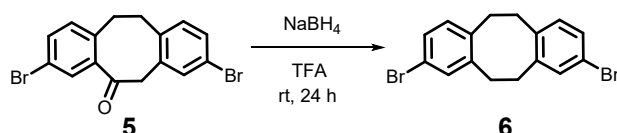

To the solution of NaBH<sub>4</sub> (1.50 g, 39.47 mmol) in trifluoroacetic acid (40 mL) was added a solution of **5** (1.00 g, 2.63 mmol) in CH<sub>2</sub>Cl<sub>2</sub> dropwise at 0° C. After stirring for 1 d at r.t., another amount of NaBH<sub>4</sub> (0.75 g, 19.73 mmol) was added and stirred for 2 h. The quenched reaction was extracted three times with CH<sub>2</sub>Cl<sub>2</sub>. The combined organic layers were dried over Na<sub>2</sub>SO<sub>4</sub> and purified by flash chromatography using PE as eluent to give **6** (0.29 g, yield: 30%). <sup>1</sup>H NMR (400 MHz, CDCl<sub>3</sub>) δ 7.12 (dd, *J* = 6.0, 2.0 Hz, 4H), 6.86–6.79 (m, 2H), 3.02 (d, *J* = 6.0 Hz, 8H). <sup>13</sup>C NMR (101 MHz, CDCl<sub>3</sub>) δ 142.1, 139.0, 132.5, 131.4, 129.2, 119.7, 34.5, 34.2. GC-MS (*m/z*): calcd. for C<sub>21</sub>H<sub>12</sub>Br<sub>2</sub>O<sub>2</sub> [M<sup>+</sup>] 365.9, found 366.0.

### 2.4 Synthesis of **7**

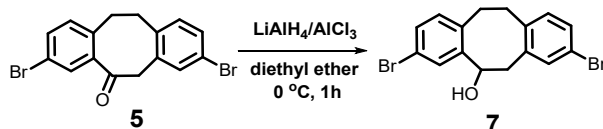

Dry diethyl ether (20 mL) was added in a 100 mL two-necked round-bottom flask equipped with a condenser in the ice bath under N<sub>2</sub>. AlCl<sub>3</sub> (0.42 g, 3.10 mmol) and LiAlH<sub>4</sub> (61 mg, 1.61 mmol) were then added slowly to the ether solution and kept stirring for 20 min. A solution of **5** (0.20 g, 0.5 mmol) in ether (20 mL) was then added dropwise. After stirring for 1 h, ethyl acetate (1 mL) was added dropwise to quench the reaction. The mixture was poured into a saturated NH<sub>4</sub>Cl solution (20 mL), and the organic layer was separated and washed with brine (20 mL). The aqueous layer was further extracted with CH<sub>2</sub>Cl<sub>2</sub> (20 mL × 3), and the combined organic phase was dried over anhydrous Na<sub>2</sub>SO<sub>4</sub>. The product was purified via column chromatography on silica gel (CH<sub>2</sub>Cl<sub>2</sub>/PE=1/3, v/v) to yield product **7** (0.15 g, yield: 75%) as a white powder. <sup>1</sup>H NMR (400 MHz, CDCl<sub>3</sub>) δ 7.40 (d, *J* = 2.0 Hz, 1H), 7.17 (dd, *J* = 8.0, 2.0 Hz, 1H), 7.14–7.08 (m, 2H), 6.80 (q, *J* = 8.0 Hz, 2H), 5.28–5.18 (m, 1H), 3.50 (q, *J* = 8.0 Hz, 1H), 3.31–3.18 (m, 1H), 3.14–2.92 (m, 4H), 2.04 (d, *J* = 3.5 Hz, 1H). <sup>13</sup>C NMR (101 MHz,

CDCl<sub>3</sub>)  $\delta$  143.5, 139.4, 138.0, 136.5, 132.8, 131.9, 131.7, 130.7, 129.7, 120.4, 119.8, 77.2, 73.6, 43.5, 34.2, 33.0. GC-MS (m/z): calcd. for C<sub>21</sub>H<sub>12</sub>Br<sub>2</sub>O<sub>2</sub> [M<sup>+</sup>] 381.9, found 382.0.

## 2.5 Synthesis of **8**

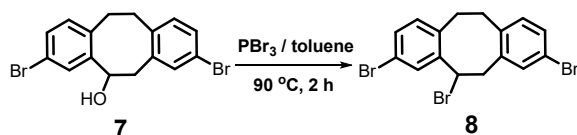

PBr<sub>3</sub> (333 g, 1.23 mmol) was added to a solution of **7** (234 mg, 0.61 mmol) in dry toluene (20 mL). The resulting mixture was heated at 95 °C for 2 h. The reaction mixture was poured into water and extracted with toluene. The organic layer was washed with water, dried over MgSO<sub>4</sub>, and concentrated under reduced pressure. The residue was purified by column chromatography on silica gel (CH<sub>2</sub>Cl<sub>2</sub>/PE=1/3, v/v) to yield **8** (0.15 g, yield: 75%) as a white powder. <sup>1</sup>H NMR (400 MHz, CDCl<sub>3</sub>)  $\delta$  7.22 (dd, *J* = 8.0, 2.0 Hz, 1H), 7.18–7.08 (m, 3H), 6.90 (d, *J* = 8.0 Hz, 1H), 6.72 (d, *J* = 8.0 Hz, 1H), 5.19 (dd, *J* = 16.0, 12.0 Hz, 1H), 3.86 (dd, *J* = 16.0, 12.0 Hz, 1H), 3.62–3.57 (m, 1H), 3.43–3.36 (m, 2H), 3.06–2.83 (m, 2H). <sup>13</sup>C NMR (101 MHz, CDCl<sub>3</sub>)  $\delta$  140.0, 138.6, 137.7, 137.6, 133.0, 132.6, 132.5, 132.1, 131.9, 130.5, 120.2, 120.0, 52.4, 43.7, 34.3, 31.8. GC-MS (m/z): calcd. for C<sub>21</sub>H<sub>12</sub>Br<sub>2</sub>O<sub>2</sub> [M<sup>+</sup>] 443.9, found 443.9.

## 2.6 Synthesis of (*Z*)-**9**

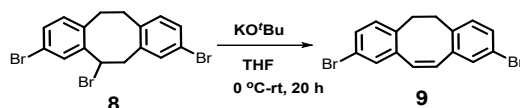

To an ice-cold suspension of KO<sup>t</sup>Bu (79 mg, 0.70 mmol) in dry THF (3 mL) was added a solution of **8** (100 mg, 0.22 mmol) in THF over 5 min. The reaction mixture was stirred for 20 h at rt., 1.5 mL of H<sub>2</sub>O was added and the mixture was poured onto a pad of silica gel wetted with diethyl ether. The pad was rinsed with diethyl ether (8 mL) and the collected organic phase was dried over Na<sub>2</sub>SO<sub>4</sub>. The solvent was removed under reduced pressure and the crude product was purified by column chromatography on silica gel using PE as eluent. The resulting product was further precipitated from methanol. <sup>1</sup>H NMR (400 MHz, CDCl<sub>3</sub>)  $\delta$  7.23–7.16 (m, 4H), 7.03–6.95 (m, 2H), 6.70 (s, 2H), 3.11 (s, 4H). <sup>13</sup>C NMR (101 MHz, CDCl<sub>3</sub>)  $\delta$  138.5, 138.0, 132.1, 131.5, 131.4, 130.1, 119.2, 34.6. GC-MS (m/z): calcd. for C<sub>21</sub>H<sub>12</sub>Br<sub>2</sub>O<sub>2</sub> [M<sup>+</sup>] 363.9, found 364.0.

## 2.7 Synthesis of **10**

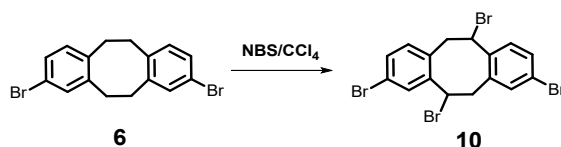

To a solution of **6** (0.12 g, 0.33 mmol) in dry  $\text{CCl}_4$  (15 mL) was added NBS (0.17 g, 0.98 mmol) and the resulting reaction mixture was refluxed at  $80\text{ }^\circ\text{C}$  for 20 h. The hot suspension was filtered through a fritted funnel and the residue was washed with  $\text{CCl}_4$  (10 mL). The filtrate was evaporated under reduced pressure. The crude product was purified by column chromatography on silica gel using PE as eluent to give **10** (0.10 g, yield: 60%).  $^1\text{H}$  NMR (400 MHz,  $\text{CDCl}_3$ )  $\delta$  7.29–7.26 (m, 1H), 7.25–7.14 (m, 3H), 6.95 (d,  $J = 8.0$  Hz, 1H), 6.85 (d,  $J = 8.0$  Hz, 1H), 5.28–5.14 (m, 2H), 4.25–4.10 (m, 2H), 3.65–3.52 (m, 2H).  $^{13}\text{C}$  NMR (101 MHz,  $\text{CDCl}_3$ )  $\delta$  140.2, 138.0, 137.3, 135.0, 133.8, 133.7, 132.5, 132.4, 132.2, 131.3, 123.1, 121.5, 50.9, 50.5, 42.9, 42.8. GC-MS (m/z): calcd. for  $\text{C}_{21}\text{H}_{12}\text{Br}_2\text{O}_2$  [ $\text{M}^+$ ] 523.8, found 523.8.

## 2.8 Synthesis of (5Z, 11Z)-11

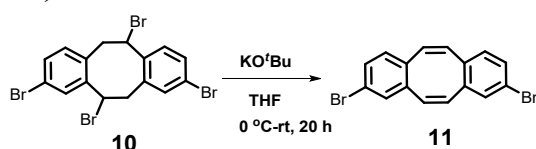

To an ice-cold suspension of KO<sup>t</sup>Bu (0.76 g, 6.77 mmol) in dry THF (10 mL) was added a solution of **10** (0.44 g, 1.91 mmol) in THF over 5 min. The reaction mixture was stirred for 20 h at r.t. Water (3.0 mL) was added and the mixture was poured onto a pad of silica gel wetted with diethyl ether. The pad was rinsed with diethyl ether (10 mL) and the collected organic phase was dried over  $\text{Na}_2\text{SO}_4$ . The solvent was removed under reduced pressure and the crude product was purified by column chromatography on silica using PE as eluent. Crystallization was performed in methanol to give product **11** (0.24 g, yield: 80%).  $^1\text{H}$  NMR (400 MHz,  $\text{CDCl}_3$ )  $\delta$  7.28 (dd,  $J = 8.0, 2.0$  Hz, 2H), 7.21 (d,  $J = 2.0$  Hz, 2H), 6.91 (d,  $J = 8.0$  Hz, 2H), 6.68 (d,  $J = 8.0$  Hz, 4H).  $^{13}\text{C}$  NMR (101 MHz,  $\text{CDCl}_3$ )  $\delta$  138.7, 135.7, 132.9, 132.8, 131.7, 130.6, 130.2, 121.0. GC-MS (m/z): calcd. for  $\text{C}_{21}\text{H}_{12}\text{Br}_2\text{O}_2$  [ $\text{M}^+$ ] 361.9, found 362.0.

## 2.9 Synthesis of 12

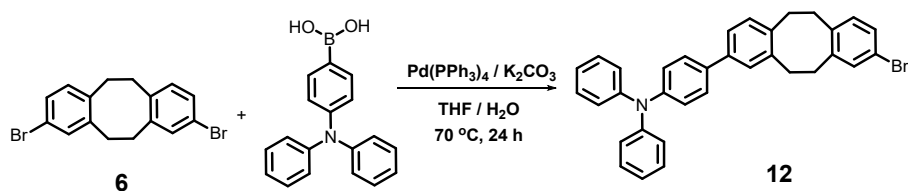

A mixture of **6** (0.20 g, 0.55 mmol), 4-(diphenylamino)phenylboronic acid (166 mg, 0.57 mmol),  $\text{K}_2\text{CO}_3$  (0.23 g, 1.66 mmol) and  $\text{Pd}(\text{PPh}_3)_4$  (32 mg, 27  $\mu\text{mol}$ ) in THF (10 mL) and deionized water (2 mL) was refluxed under  $\text{N}_2$  for 24 h. After the mixture was cooled down, deionized water (10 mL) was added to the resulting solution and the mixture was extracted with  $\text{CH}_2\text{Cl}_2$  three times. The organic phase was dried over  $\text{Na}_2\text{SO}_4$  and was further purified by column chromatography on silica gel using

CH<sub>2</sub>Cl<sub>2</sub>/PE (1/8, v/v) as eluent to give **12** as a white solid (0.12 g, yield: 40%). <sup>1</sup>H NMR (400 MHz, CDCl<sub>3</sub>) δ 7.41 (d, *J* = 8.0 Hz, 2H), 7.30–7.18 (m, 6H), 7.15–7.06 (m, 8H), 7.05–6.96 (m, 3H), 6.86 (d, *J* = 8.0 Hz, 1H), 3.15–3.01 (m, 8H). <sup>13</sup>C NMR (101 MHz, CDCl<sub>3</sub>) δ 147.7, 146.9, 142.7, 140.3, 139.5, 138.8, 138.5, 135.0, 132.5, 131.4, 130.2, 129.2, 129.1, 128.1, 127.5, 124.4, 124.3, 124.1, 122.8, 119.6, 35.0, 34.9, 34.5. ESI-HRMS (*m/z*): calcd. for C<sub>34</sub>H<sub>28</sub>BrN [M+H]<sup>+</sup> 530.1483, found 530.1494.

## 2.10 Synthesis of M1

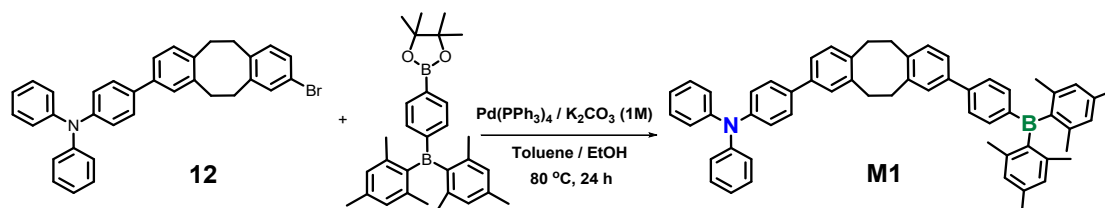

The mixture of **12** (0.10 g, 0.19 mmol), 2-(4-(dimesitylboryl)phenyl)-4,4,5,5-tetramethyl-1,3,2-dioxaborolane (0.11 g, 0.24 mmol), Pd(PPh<sub>3</sub>)<sub>4</sub> (10 mg, 9 μmol), toluene (6 mL), ethanol (2 mL) and 1 M K<sub>2</sub>CO<sub>3</sub> aqueous solution (1 mL) in the round-bottom flask were heated to 80 °C, and stirred under an argon atmosphere for 8 h. The mixture was then cooled to r.t. and poured into H<sub>2</sub>O (100 mL). After extraction with CH<sub>2</sub>Cl<sub>2</sub>, the organic phase was dried over Na<sub>2</sub>SO<sub>4</sub>. Purification by column chromatography on silica using CH<sub>2</sub>Cl<sub>2</sub>/ petroleum ether (1:6, v/v) as eluent yielded **M1** (44 mg, yield: 30%). <sup>1</sup>H NMR (400 MHz, CDCl<sub>3</sub>) δ 7.56–7.48 (m, 4H), 7.42–7.37 (m, 2H), 7.32 (d, *J* = 4.0 Hz, 2H), 7.23–7.18 (m, 6H), 7.12–7.05 (m, 8H), 7.03–6.97 (m, 2H), 6.82 (s, 4H), 3.15 (d, *J* = 12.0 Hz, 8H), 2.31 (s, 6H), 2.01 (s, 12H). <sup>13</sup>C NMR (101 MHz, CDCl<sub>3</sub>) δ 147.7, 146.8, 144.2, 140.8, 138.5, 138.4, 138.4, 137.1, 135.1, 130.3, 130.2, 129.2, 128.6, 128.1, 127.5, 126.3, 124.9, 124.3, 124.2, 124.1, 122.8, 35.5, 35.0, 34.9, 23.5, 21.2. <sup>11</sup>B NMR (225 MHz, CDCl<sub>3</sub>) δ 75 ppm. ESI-HRMS (*m/z*): calcd. for C<sub>58</sub>H<sub>54</sub>BN [M+H]<sup>+</sup> 776.4428, found 776.4414.

## 2.11 Synthesis of (Z)-13

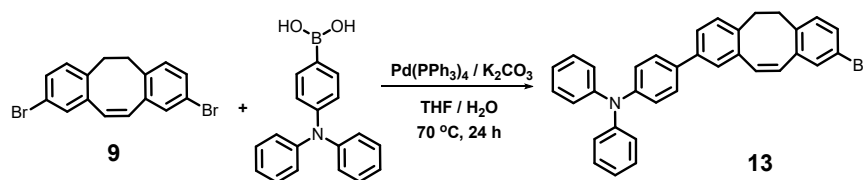

A mixture of **9** (0.15 g, 0.41 mmol), (4-(diphenylamino)phenyl)boronic acid (0.12 g, 0.42 mmol), K<sub>2</sub>CO<sub>3</sub> (0.25 g, 1.80 mmol) and Pd(PPh<sub>3</sub>)<sub>4</sub> (24 mg, 21 μmol) in THF (20 mL) and deionized water (4 mL) was refluxed at 70 °C under N<sub>2</sub> for 24 h. After the mixture was cooled down, the reaction was quenched with water (10 mL) and was then extracted with CH<sub>2</sub>Cl<sub>2</sub> three times. The organic phase was dried over anhydrous MgSO<sub>4</sub>, and the crude product was purified by column chromatography on silica gel

using CH<sub>2</sub>Cl<sub>2</sub>/ petroleum ether (1:8, v/v) as an eluent to give **13** as a white solid (76 mg, yield: 35%). <sup>1</sup>H NMR (400 MHz, CDCl<sub>3</sub>) δ 7.43–7.37 (m, 2H), 7.33–7.15 (m, 9H), 7.14–7.06 (m, 6H), 7.05–6.98 (m, 3H), 6.84 (d, *J* = 12.4 Hz, 1H), 6.69 (d, *J* = 12.4 Hz, 1H), 3.25–3.10 (m, 4H). <sup>13</sup>C NMR (101 MHz, CDCl<sub>3</sub>) δ 147.7, 147.0, 138.9, 138.6, 137.9, 137.5, 136.6, 134.6, 132.8, 132.1, 131.4, 130.6, 130.2, 129.9, 129.2, 128.0, 127.5, 125.4, 124.3, 124.0, 122.9, 119.0, 35.1, 34.7. ESI-HRMS (*m/z*): calcd. for C<sub>34</sub>H<sub>26</sub>BrN [M+H]<sup>+</sup> 528.1327, found 528.1324.

## 2.12 Synthesis of M2

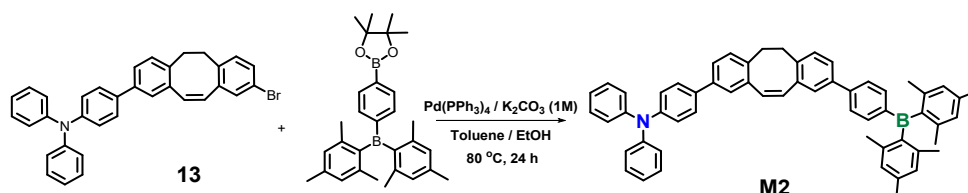

The mixture of **13** (0.10 g, 0.19 mmol), 2-(4-(dimesitylboryl)phenyl)-4,4,5,5-tetramethyl-1,3,2-dioxaborolane (0.11 g, 0.24 mmol), Pd(PPh<sub>3</sub>)<sub>4</sub> (10 mg, 8.65 mmol), toluene (6 mL), ethanol (2 mL) and 1 M K<sub>2</sub>CO<sub>3</sub> aqueous solution (1 mL) in the round-bottom flask were heated to 80 °C, and stirred under an argon atmosphere for 8 h. The mixture was then cooled to room temperature and poured into water (100 mL). After extraction with CH<sub>2</sub>Cl<sub>2</sub>, the organic phase was dried over Na<sub>2</sub>SO<sub>4</sub>. Purification by column chromatography on silica gel using CH<sub>2</sub>Cl<sub>2</sub>/ petroleum ether (1:10, v/v) as eluent yielded **M2** (59 mg, 40%). Crystallization was performed in CH<sub>2</sub>Cl<sub>2</sub>/hexane. <sup>1</sup>H NMR (400 MHz, CDCl<sub>3</sub>) δ 7.56–7.48 (m, 4H), 7.42–7.36 (m, 4H), 7.32–7.28 (m, 2H), 7.25–7.18 (m, 6H), 7.13–7.05 (m, 6H), 7.04–6.97 (m, 2H), 6.84 (s, 2H), 6.82 (s, 4H), 3.26 (s, 4H), 2.31 (s, 6H), 2.01 (s, 12H). <sup>13</sup>C NMR (101 MHz, CDCl<sub>3</sub>) δ 147.7, 147.0, 143.9, 140.8, 139.3, 138.6, 138.0, 137.8, 137.2, 137.0, 136.9, 134.8, 131.9, 131.5, 130.5, 128.6, 128.2, 127.6, 126.3, 125.7, 125.3, 124.3, 124.0, 122.8, 35.2, 23.5, 21.2. <sup>11</sup>B NMR (225 MHz, CDCl<sub>3</sub>) δ 75 ppm. ESI-HRMS (*m/z*): calcd. for C<sub>58</sub>H<sub>52</sub>BN [M] 773.4193, found 773.4223.

## 2.13 Synthesis of (5Z, 11Z)-14

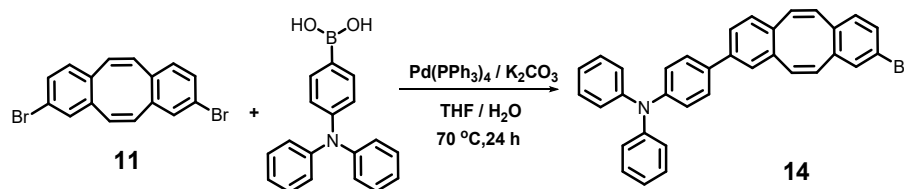

A mixture of **11** (0.17 g, 0.47 mmol), (4-(diphenylamino)phenyl)boronic acid (136 mg, 0.47 mmol), K<sub>2</sub>CO<sub>3</sub> (0.26 g, 1.88 mmol) and Pd(PPh<sub>3</sub>)<sub>4</sub> (27 mg, 23.4 μmol) in THF (15 mL) and deionized water (2 mL) was refluxed under N<sub>2</sub> for 24 h. After the mixture was cooled down, 10 mL of deionized water was added to the resulting solution and the



mixture was extracted with CH<sub>2</sub>Cl<sub>2</sub> three times. The organic phase was dried over anhydrous MgSO<sub>4</sub>, and the residue was purified by column chromatography on silica gel using CH<sub>2</sub>Cl<sub>2</sub>/ petroleum ether (1:8, v/v) as eluent to give **14** as a white solid (99 mg, yield: 40%). <sup>1</sup>H NMR (400 MHz, CDCl<sub>3</sub>) δ 7.44–7.34 (m, 3H), 7.30–7.20 (m, 7H), 7.15–7.06 (m, 7H), 7.05–6.99 (m, 2H), 6.93 (d, *J* = 8.0 Hz, 1H), 6.80 (t, *J* = 12.4 Hz, 2H), 6.73–6.63 (m, 2H). <sup>13</sup>C NMR (101 MHz, CDCl<sub>3</sub>) δ 147.6, 147.3, 139.4, 139.2, 137.0, 136.1, 135.2, 134.3, 134.2, 133.7, 132.2, 132.0, 131.8, 130.7, 130.0, 129.6, 127.6, 127.2, 125.3, 124.4, 123.8, 123.0, 120.8. ESI-HRMS (*m/z*): calcd. for C<sub>34</sub>H<sub>24</sub>BrN [M+H]<sup>+</sup> 526.1170, found 526.1175.

## 2.14 Synthesis of (5Z, 11Z)-M3

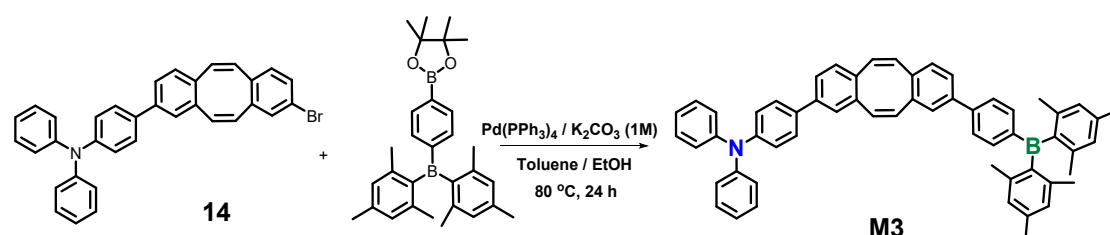

The mixture of **14** (0.10 g, 1.90 mmol), 2-(4-(dimesitylboryl)phenyl)-4,4,5,5-tetramethyl-1,3,2-dioxaborolane (0.10 g, 2.28 mmol), Pd(PPh<sub>3</sub>)<sub>4</sub> (11 mg, 9.5 μmol), toluene (6 mL), ethanol (2 mL) and 1 M K<sub>2</sub>CO<sub>3</sub> aqueous solution (1 mL) in the round-bottom flask were heated to 80 °C, and stirred under an argon atmosphere for 8 h. The mixture was then cooled to r.t. and poured into water (100 mL). After extraction with CH<sub>2</sub>Cl<sub>2</sub>, the organic phase was dried over Na<sub>2</sub>SO<sub>4</sub>. Purification by column chromatography on silica gel using CH<sub>2</sub>Cl<sub>2</sub>/ petroleum ether (1:6, v/v) as eluent yielded **M3** (44 mg, yield: 30%). <sup>1</sup>H NMR (400 MHz, CDCl<sub>3</sub>) δ 7.57–7.49 (m, 4H), 7.46 (dd, *J* = 8.0, 2.0 Hz, 1H), 7.43–7.34 (m, 4H), 7.30–7.21 (m, 5H), 7.16–7.06 (m, 8H), 7.0–6.98 (m, 2H), 6.82 (d, *J* = 6.4 Hz, 6H), 6.80 (s, 2H), 2.31 (s, 6H), 2.01 (s, 12H). <sup>13</sup>C NMR (101 MHz, CDCl<sub>3</sub>) δ 147.7, 147.2, 143.6, 139.3, 139.2, 138.6, 137.6, 137.4, 137.0, 136.7, 135.5, 134.3, 133.6, 133.4, 133.3, 133.0, 129.8, 129.7, 129.3, 128.2, 127.6, 127.3, 126.3, 125.7, 125.2, 124.4, 123.8, 122.9, 53.4, 23.5, 21.2. <sup>11</sup>B NMR (225 MHz, CDCl<sub>3</sub>) δ 75 ppm. ESI-HRMS (*m/z*): calcd. for C<sub>58</sub>H<sub>52</sub>BN [M+H]<sup>+</sup> 772.4115, found 772.4110.

## Reference:

- [1] P. Mücke, M. Zabel, R. Edge, D. Collison, S. Clément, S. Záliš and R. F. Winter. *Journal of Organometallic Chemistry*, 2011, 3186–3197.
- [2] (a) C. Lee, W. Yang, R. G. Parr, *Phys. Rev. B*, **1988**, 37, 785-789. (b) A. D. Becke, *J. Chem. Phys.* **1993**, 98, 1372–1377. (c) A. D. Becke, *J. Chem. Phys.* **1993**, 98, 5648–5652.

### 3. Characterization by NMR and HRMS Spectroscopy

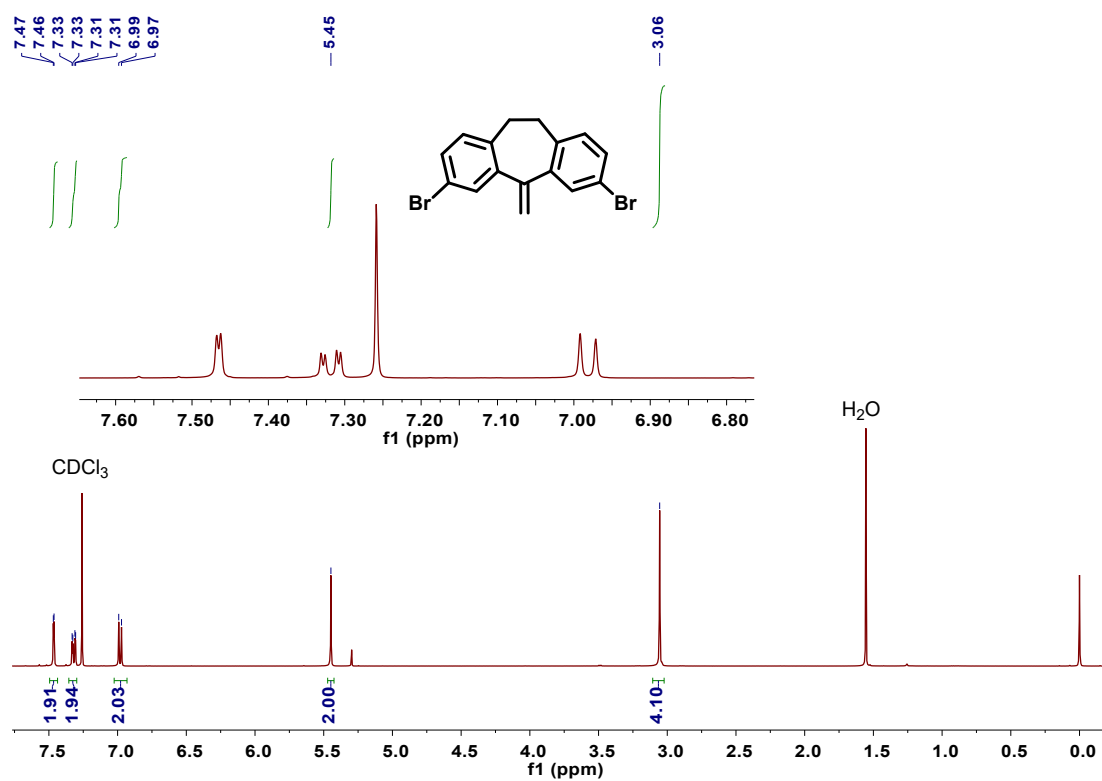

Figure S1.  $^1\text{H NMR}$  (400 MHz,  $\text{CDCl}_3$ ) spectrum of 4.

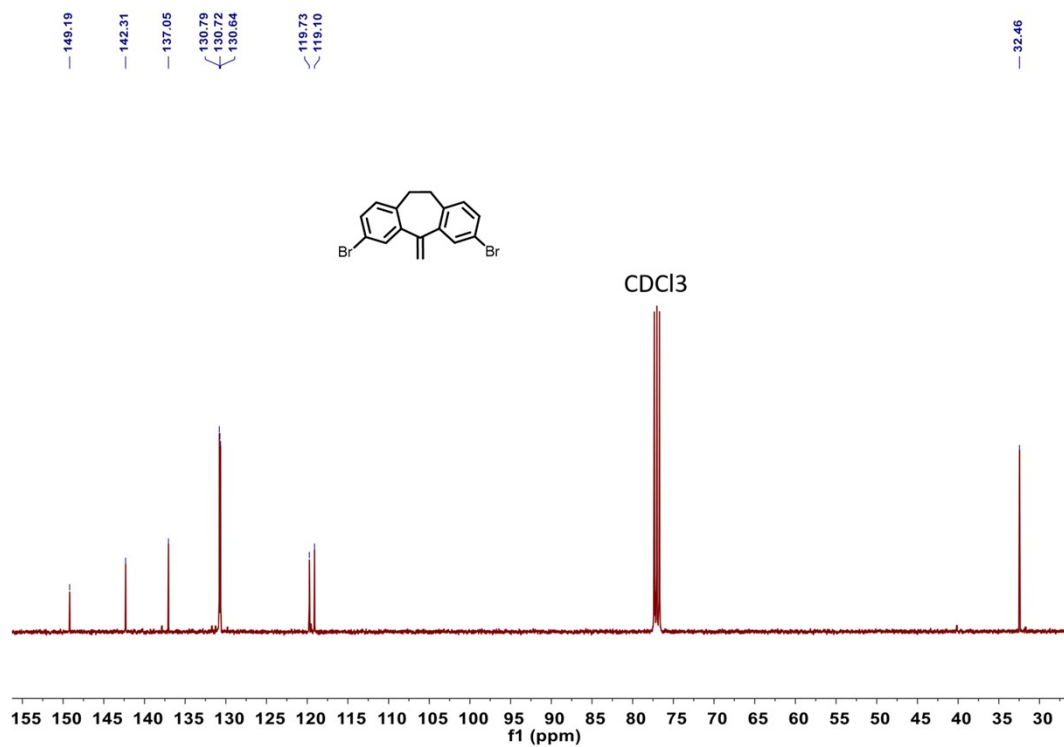

Figure S2.  $^{13}\text{C NMR}$  (101 MHz,  $\text{CDCl}_3$ ) spectrum of 4.

Fig

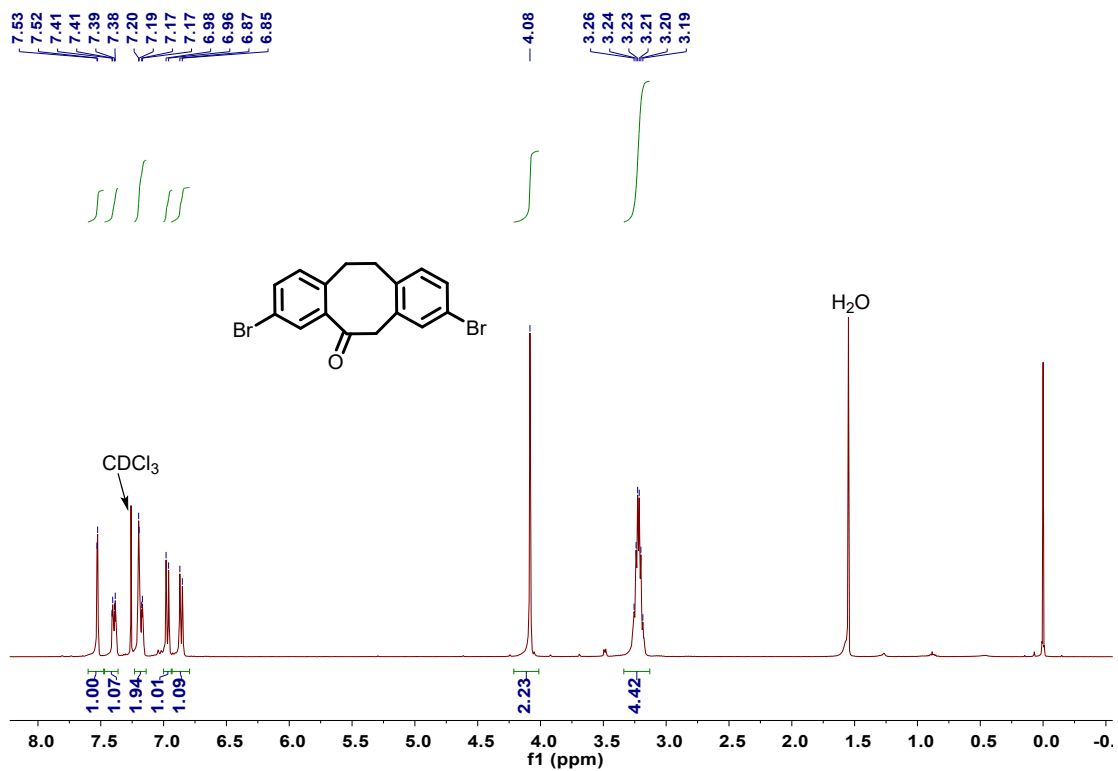

Figure S3.  $^1\text{H}$  NMR (400 MHz,  $\text{CDCl}_3$ ) spectrum of 5.

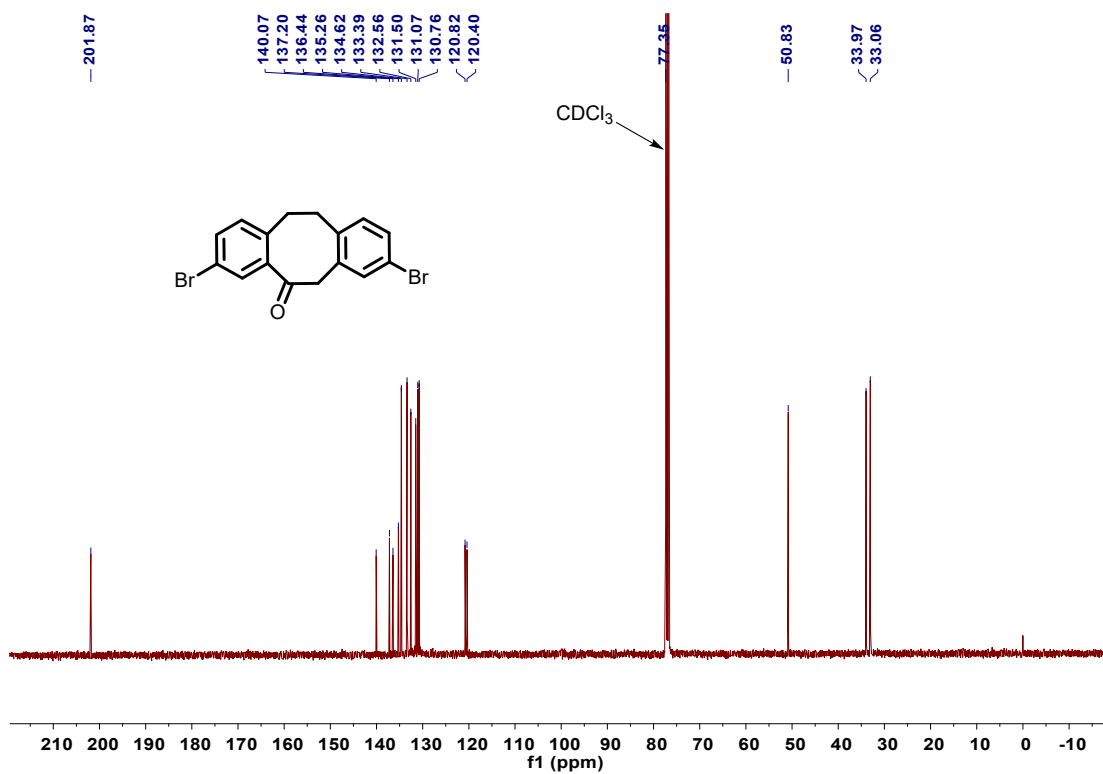

Figure S4.  $^{13}\text{C}$  NMR (101 MHz,  $\text{CDCl}_3$ ) spectrum of 5.

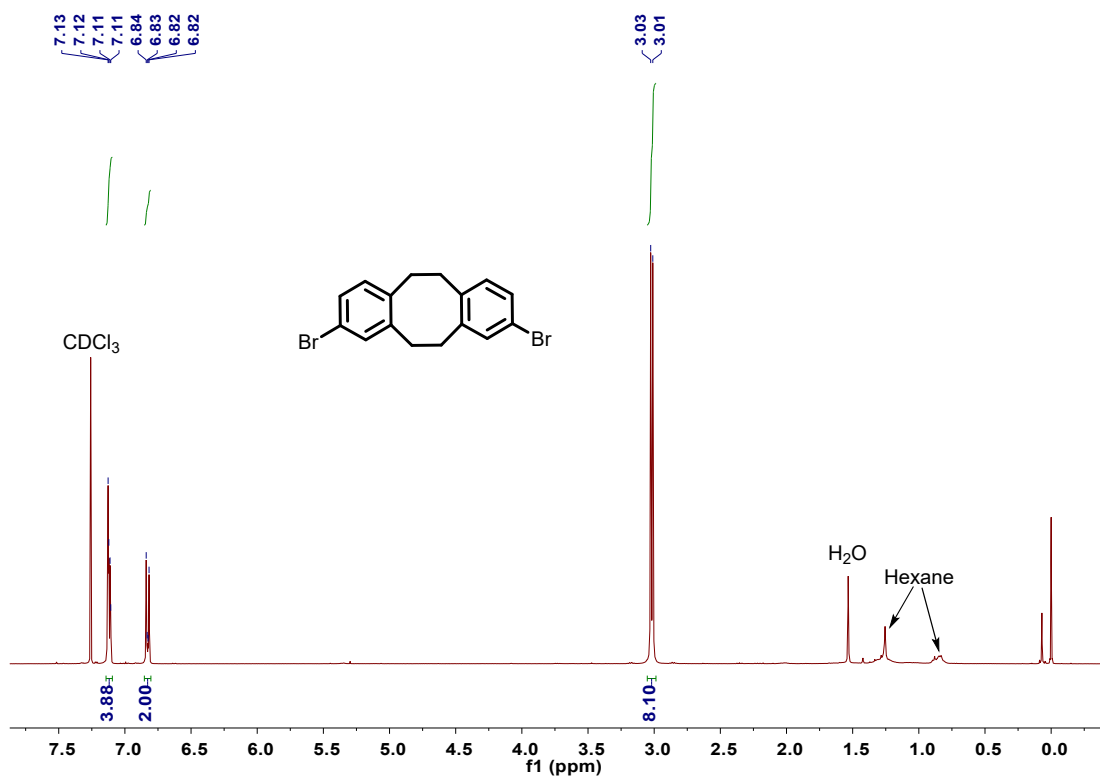

Figure S5. <sup>1</sup>H NMR (400 MHz, CDCl<sub>3</sub>) spectrum of 6.

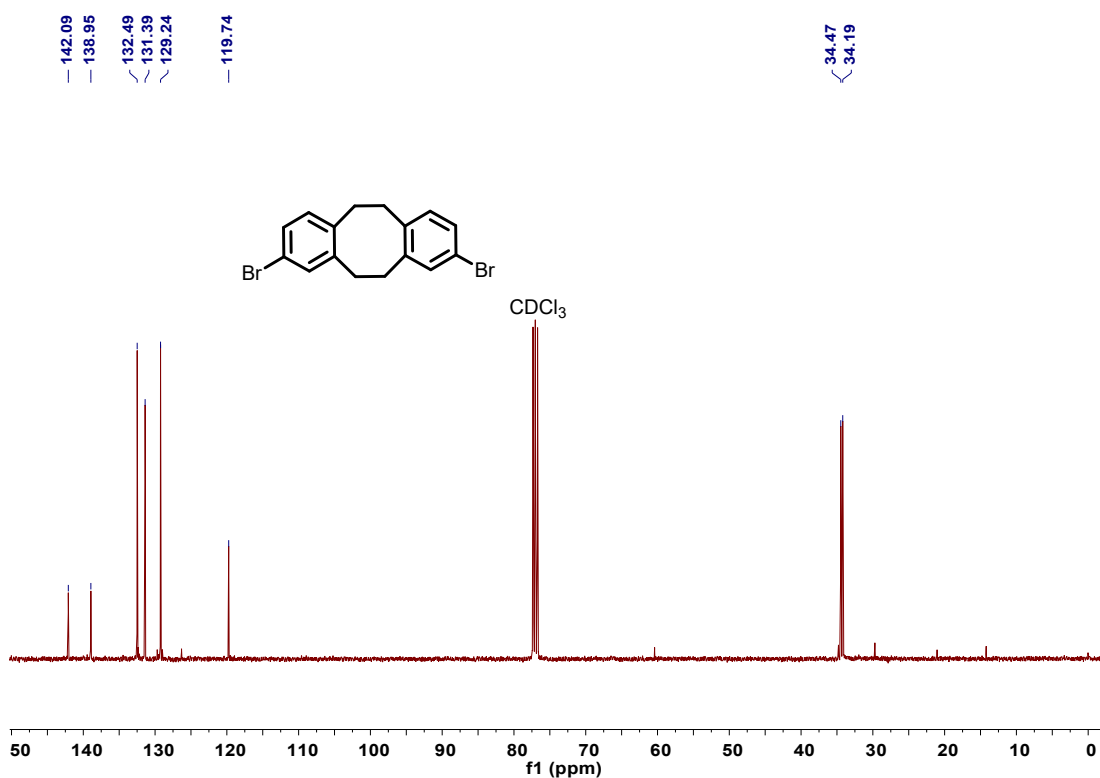

Figure S6. <sup>13</sup>C NMR (101 MHz, CDCl<sub>3</sub>) spectrum of 6.

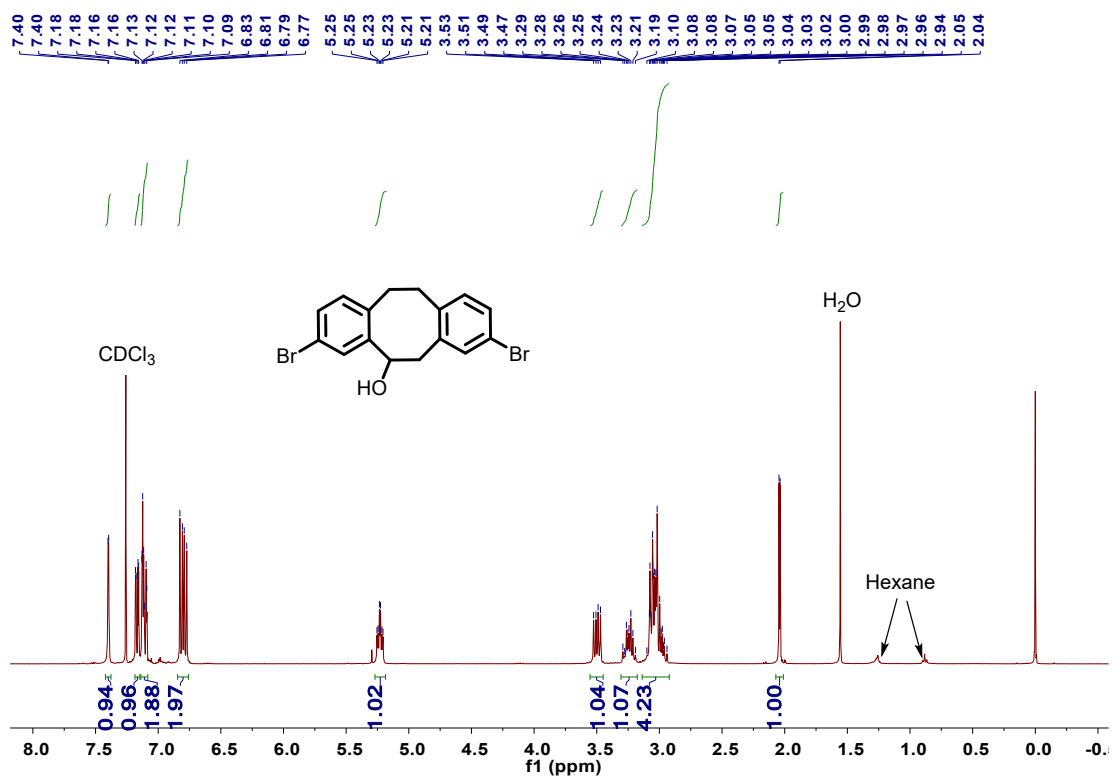

Figure S7. <sup>1</sup>H NMR (400 MHz, CDCl<sub>3</sub>) spectrum of 7.

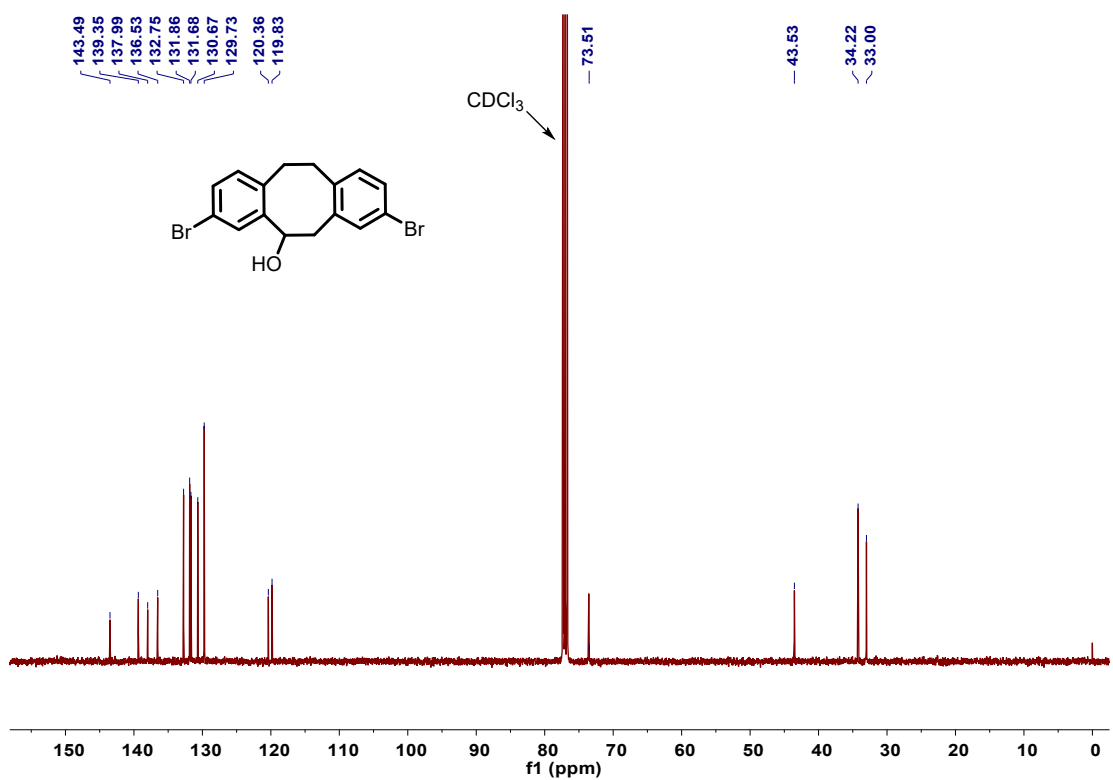

Figure S8. <sup>13</sup>C NMR (101 MHz, CDCl<sub>3</sub>) spectrum of 7.

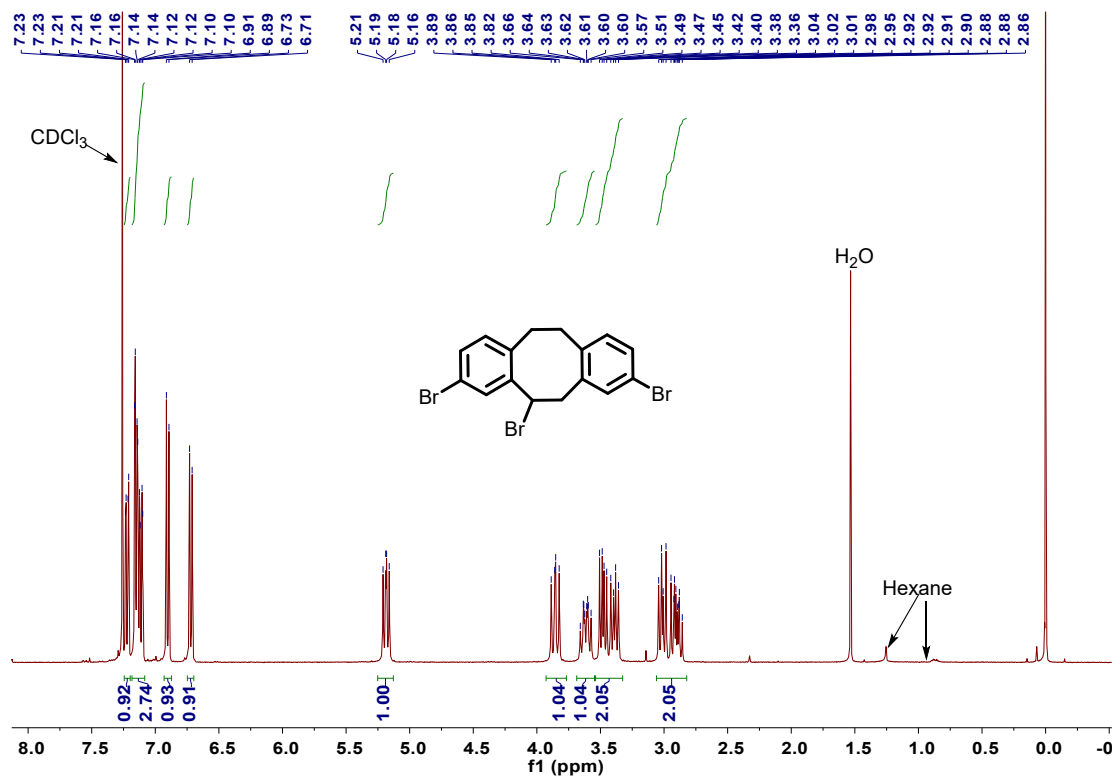

Figure S9. <sup>1</sup>H NMR (400 MHz, CDCl<sub>3</sub>) spectrum of **8**.

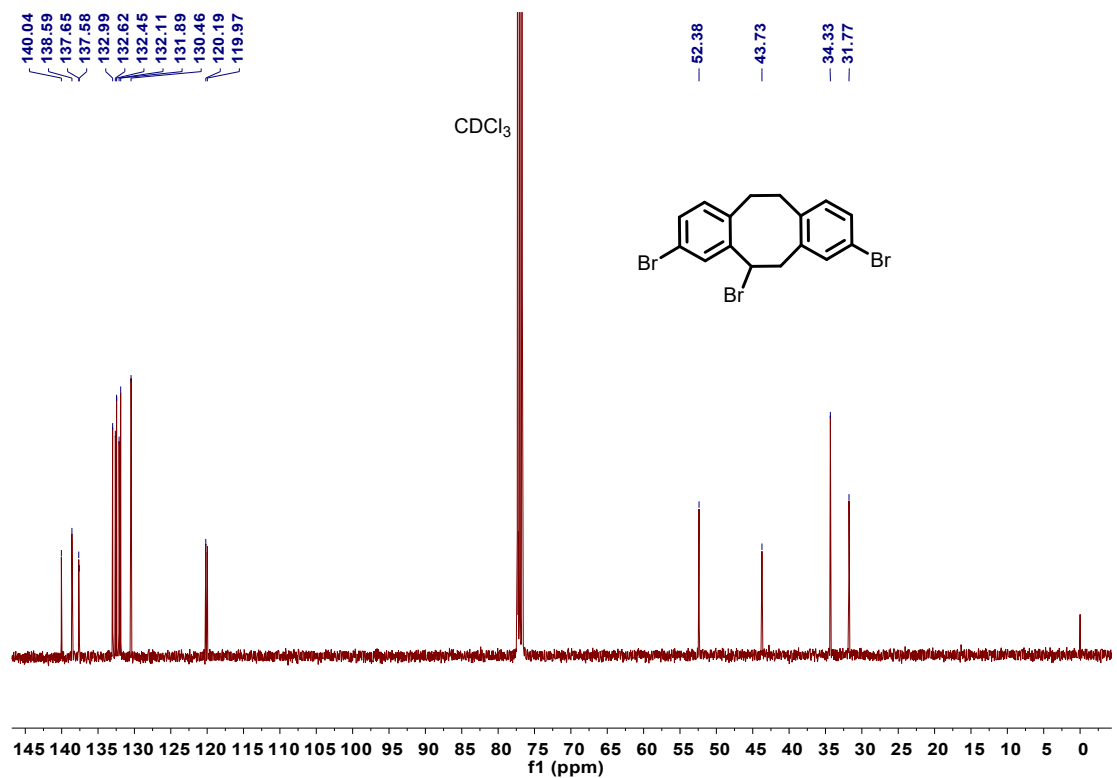

Figure S10. <sup>13</sup>C NMR (101 MHz, CDCl<sub>3</sub>) spectrum of **8**.

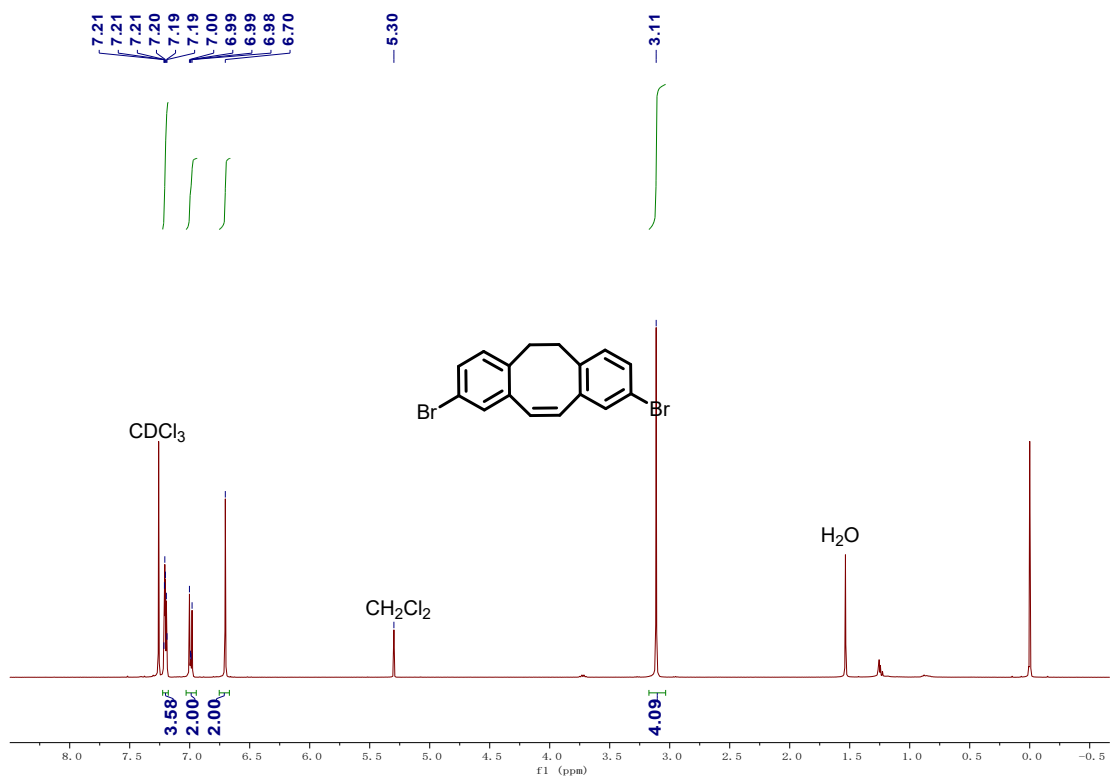

**Figure S11.** <sup>1</sup>H NMR (400 MHz, CDCl<sub>3</sub>) spectrum of **9**.

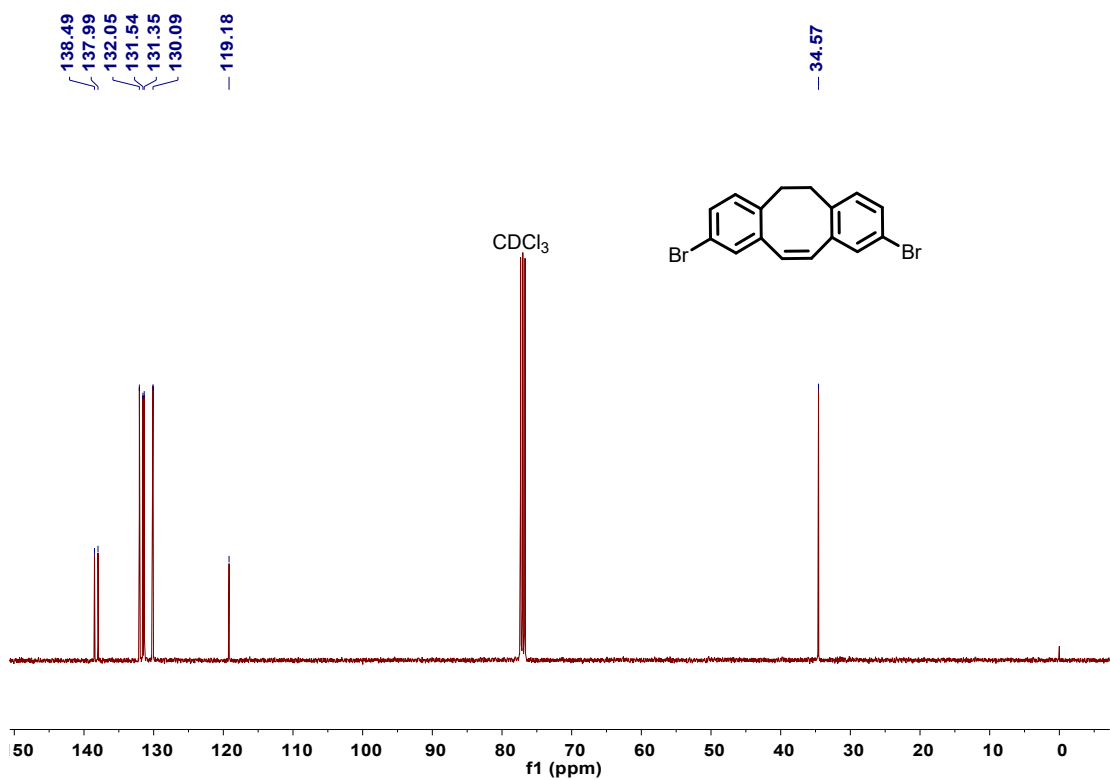

**Figure S12.** <sup>13</sup>C NMR (101 MHz, CDCl<sub>3</sub>) spectrum of **9**.

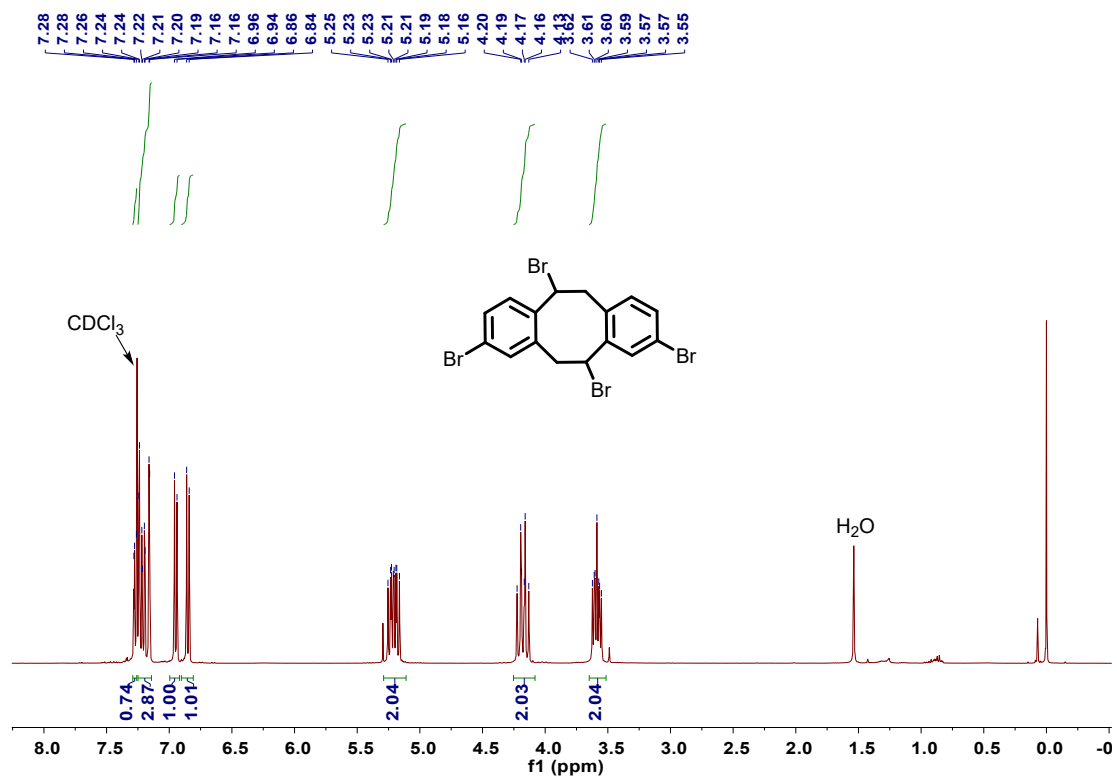

Figure S13.  $^1\text{H NMR}$  (400 MHz,  $\text{CDCl}_3$ ) spectrum of 10.

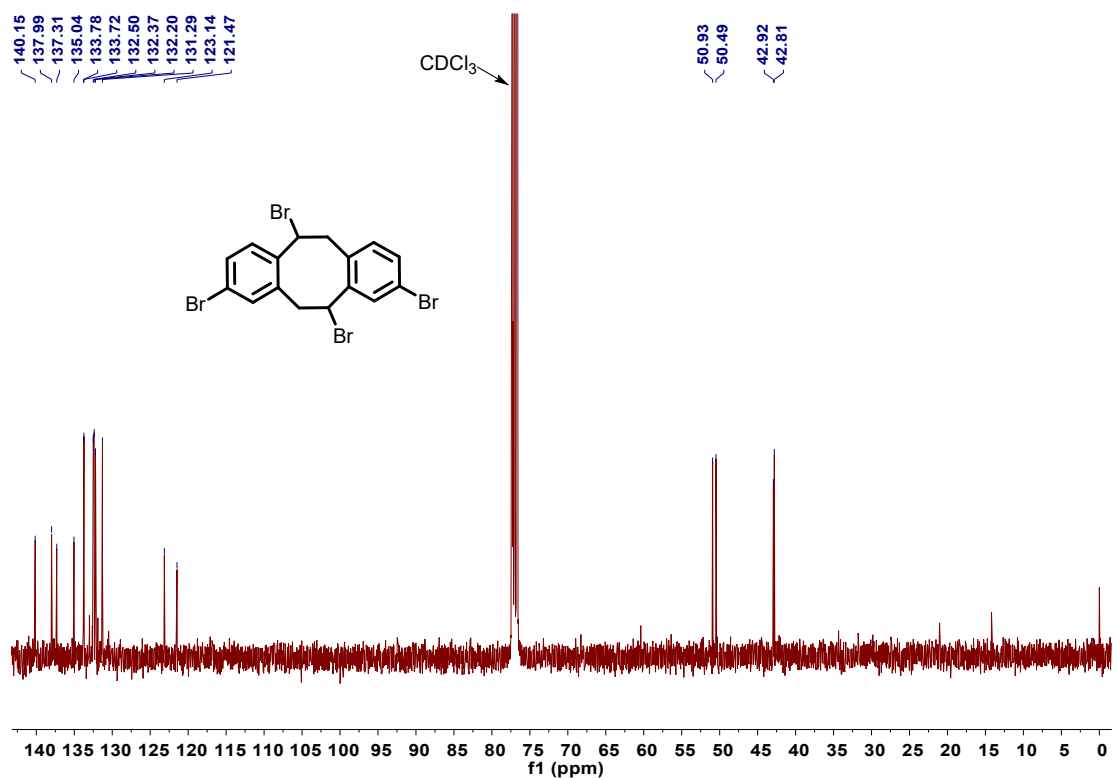

Figure S14.  $^{13}\text{C NMR}$  (101 MHz,  $\text{CDCl}_3$ ) spectrum of 10.



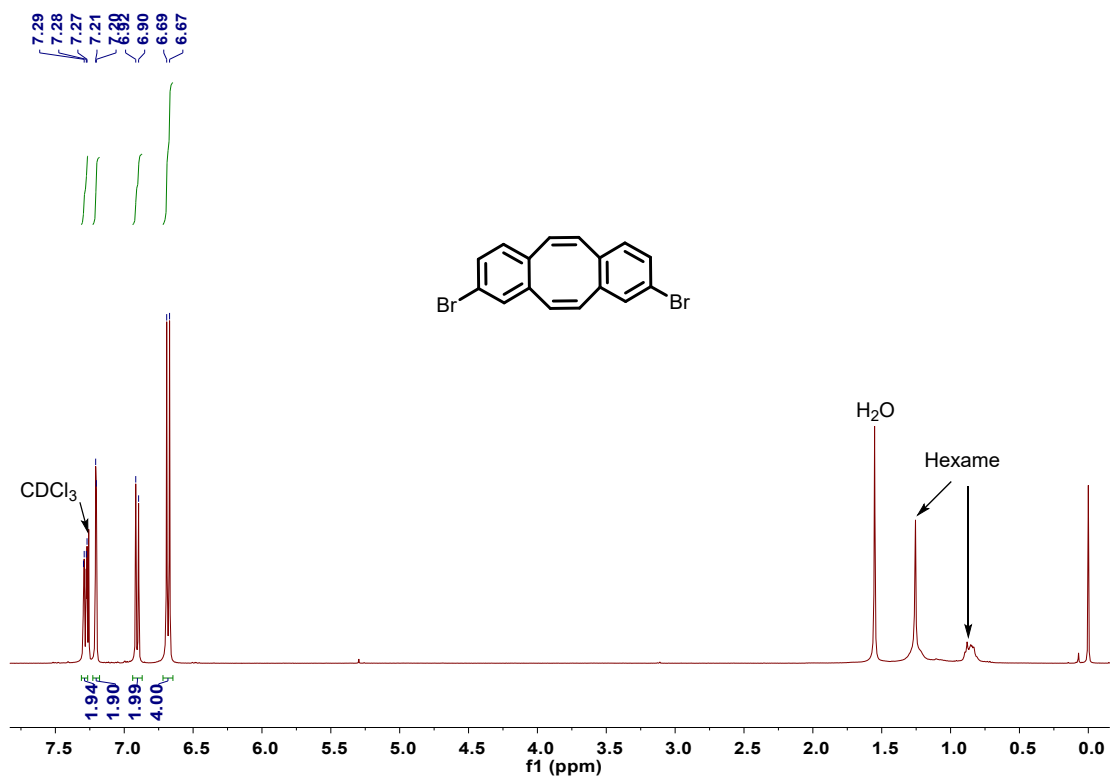

Figure S15. <sup>1</sup>H NMR (400 MHz, CDCl<sub>3</sub>) spectrum of 11.

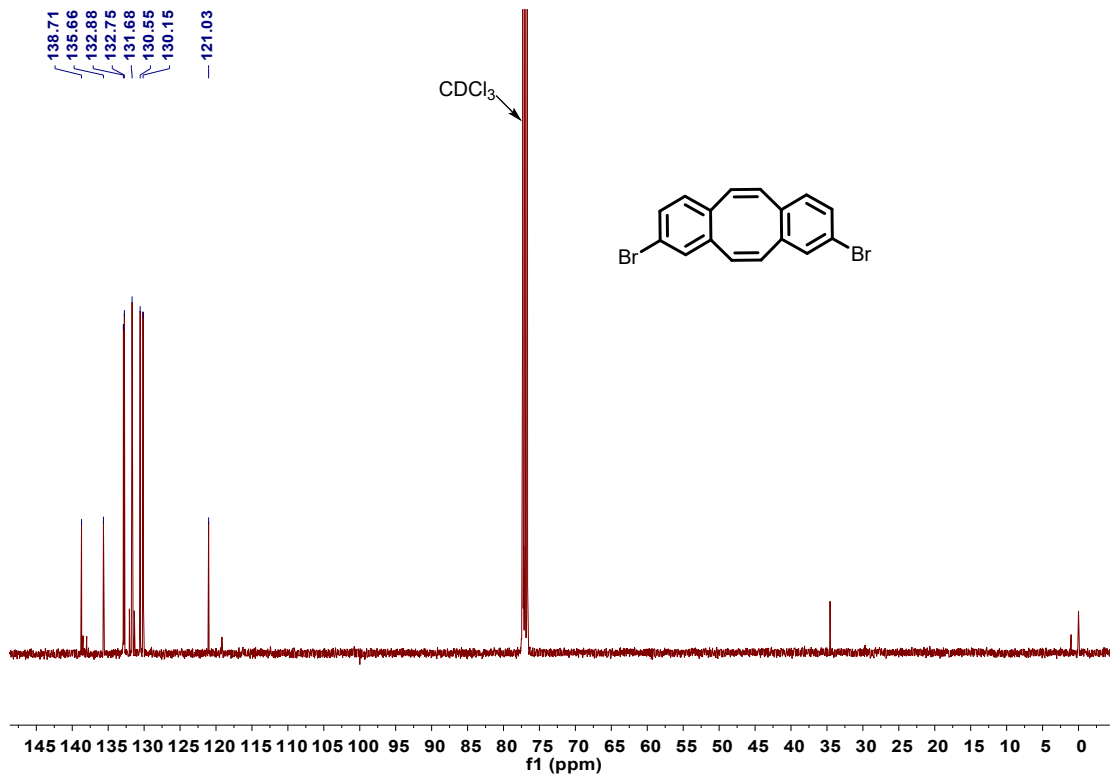

Figure S16. <sup>13</sup>C NMR (101 MHz, CDCl<sub>3</sub>) spectrum of 11.

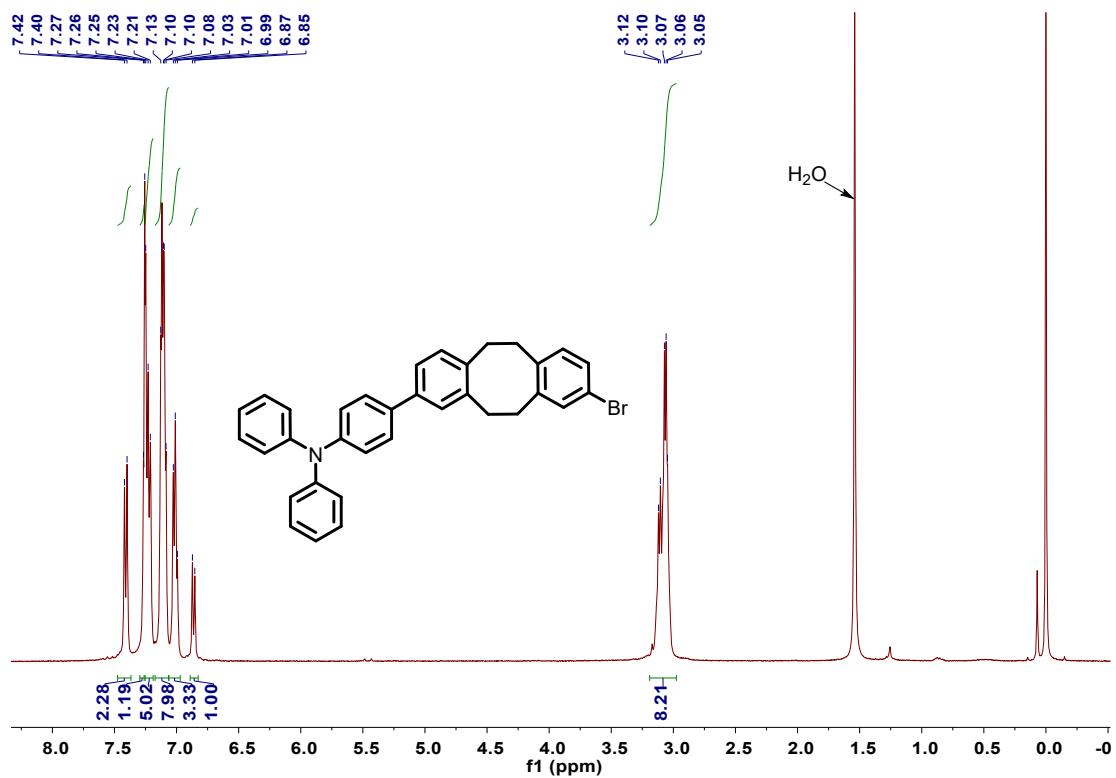

Figure S17.  $^1\text{H NMR}$  (400 MHz,  $\text{CDCl}_3$ ) spectrum of 12.

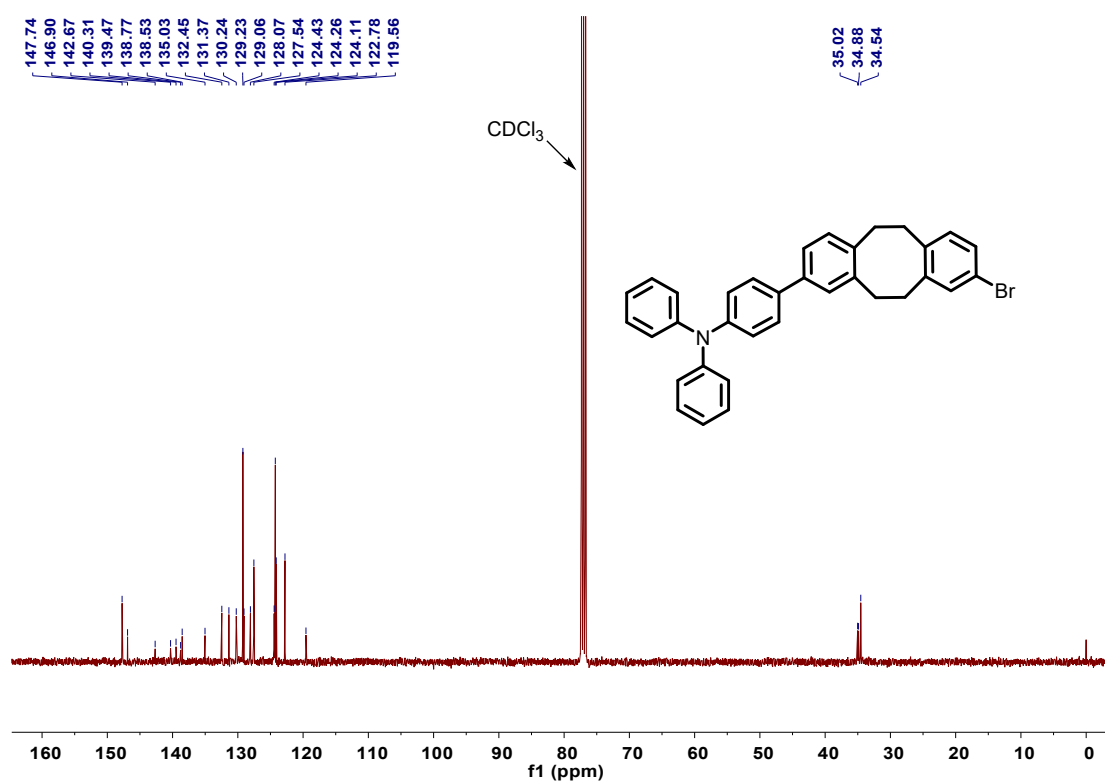

Figure S18.  $^{13}\text{C NMR}$  (101 MHz,  $\text{CDCl}_3$ ) spectrum of 12.

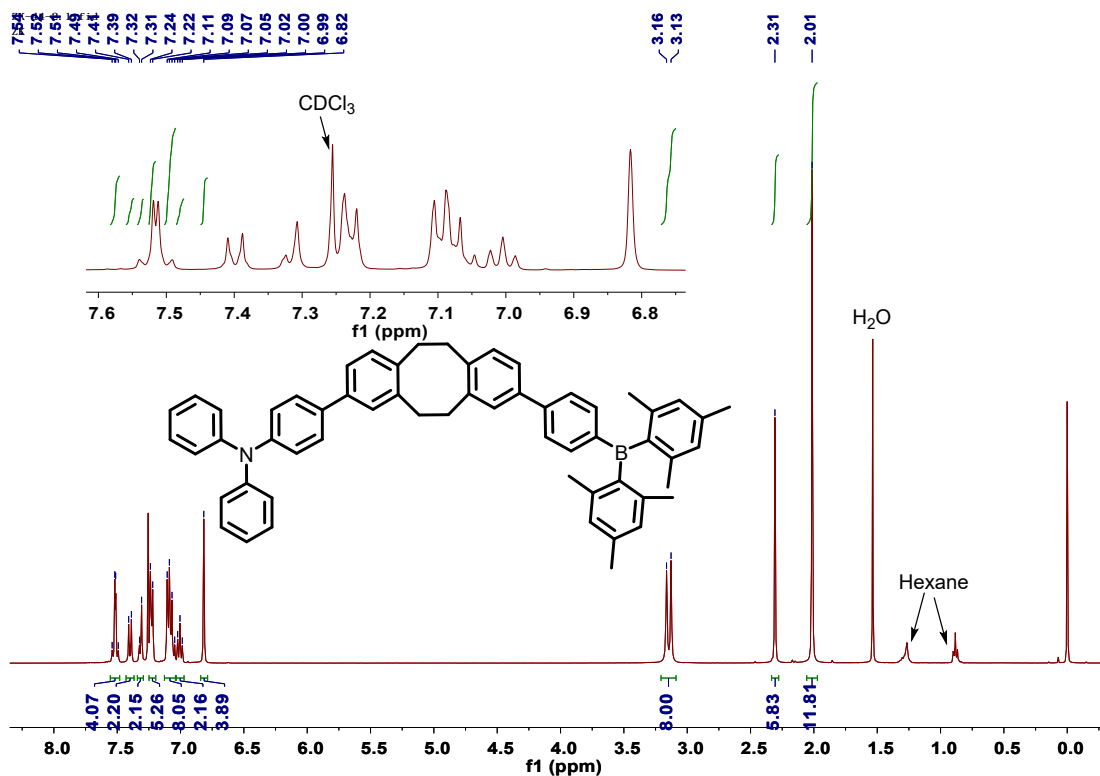

Figure S19. <sup>1</sup>H NMR (400 MHz, CDCl<sub>3</sub>) spectrum of M1.

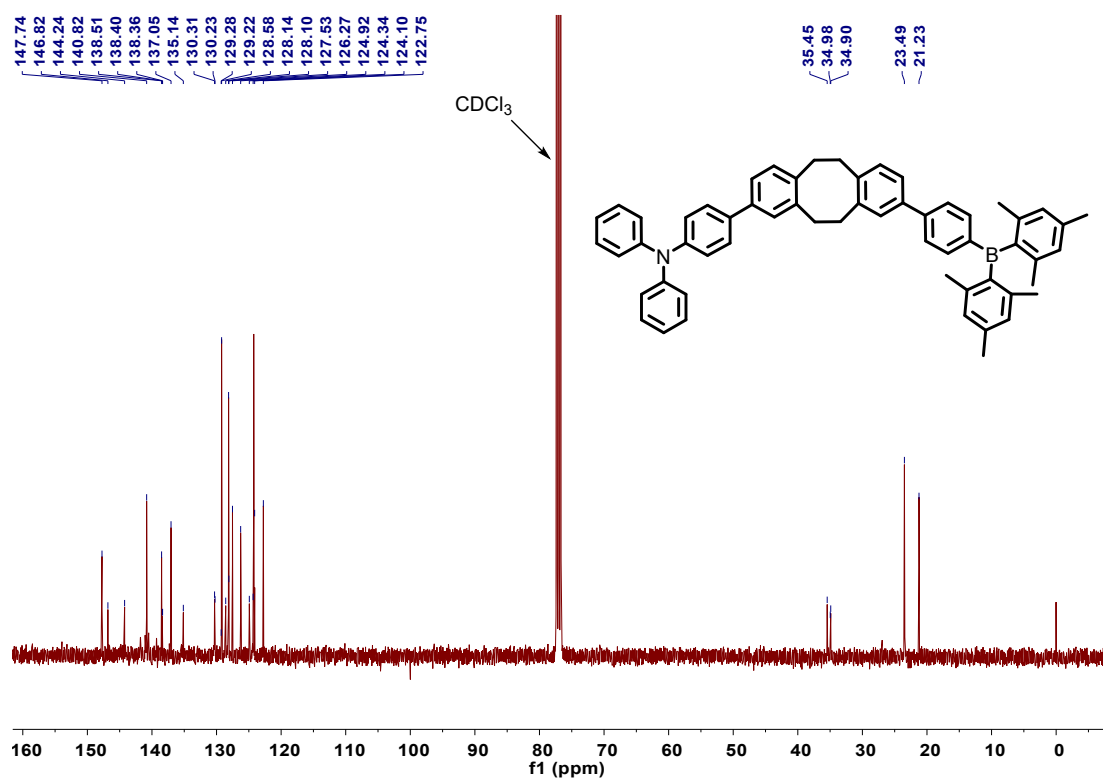

Figure S20. <sup>13</sup>C NMR (101 MHz, CDCl<sub>3</sub>) spectrum of M1.

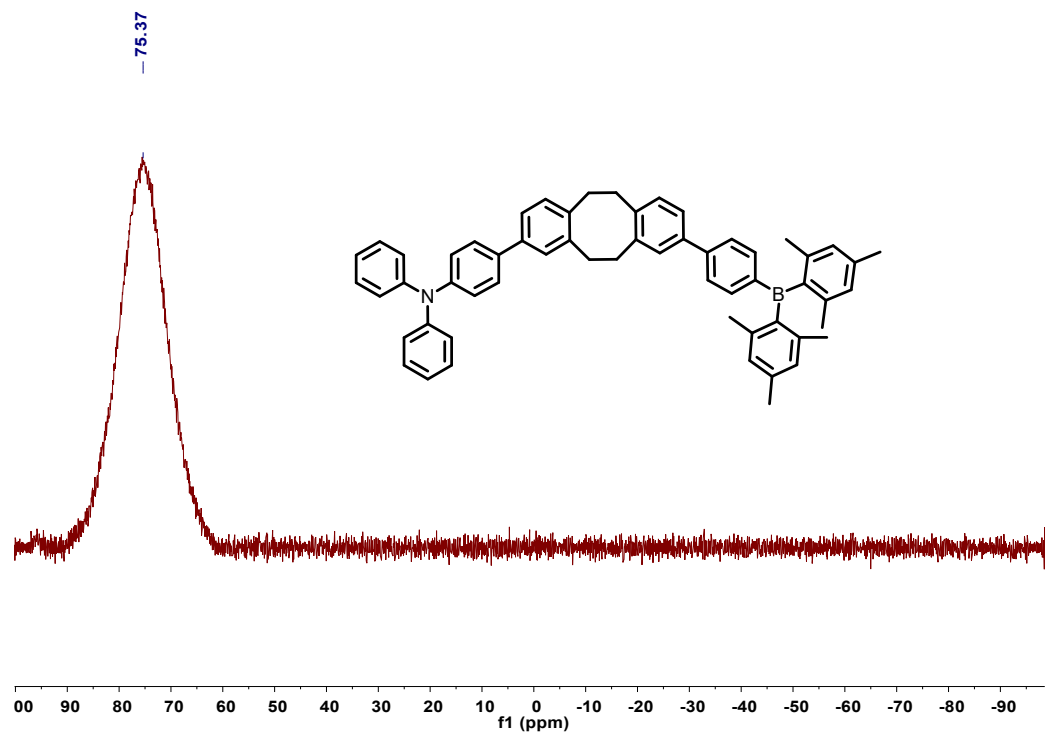

Figure S21.  $^{11}\text{B}$  NMR (225 MHz,  $\text{C}_6\text{D}_6$ ) spectrum of **M1**.

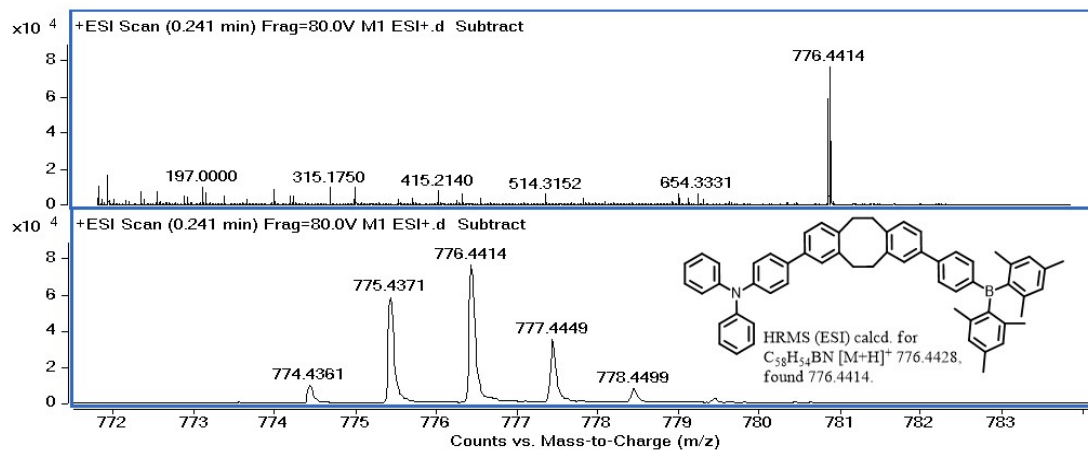

Figure S22. HRMS spectrum for **M1**.

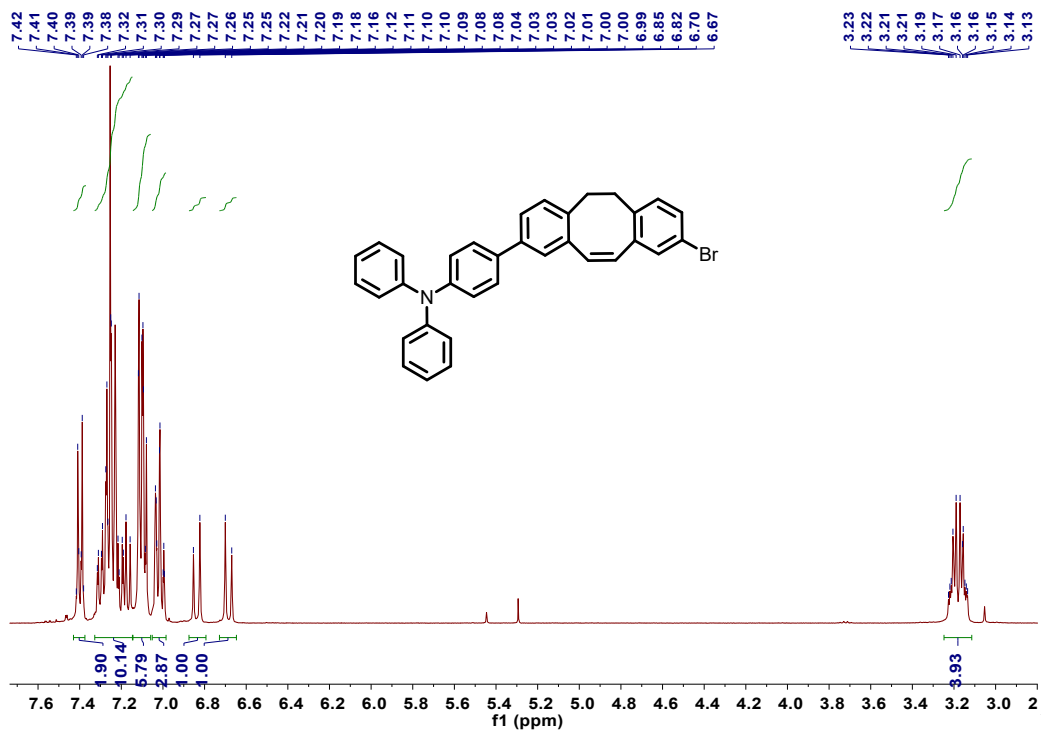

re S23.  $^1\text{H}$  NMR (400 MHz,  $\text{CDCl}_3$ ) spectrum of 13.

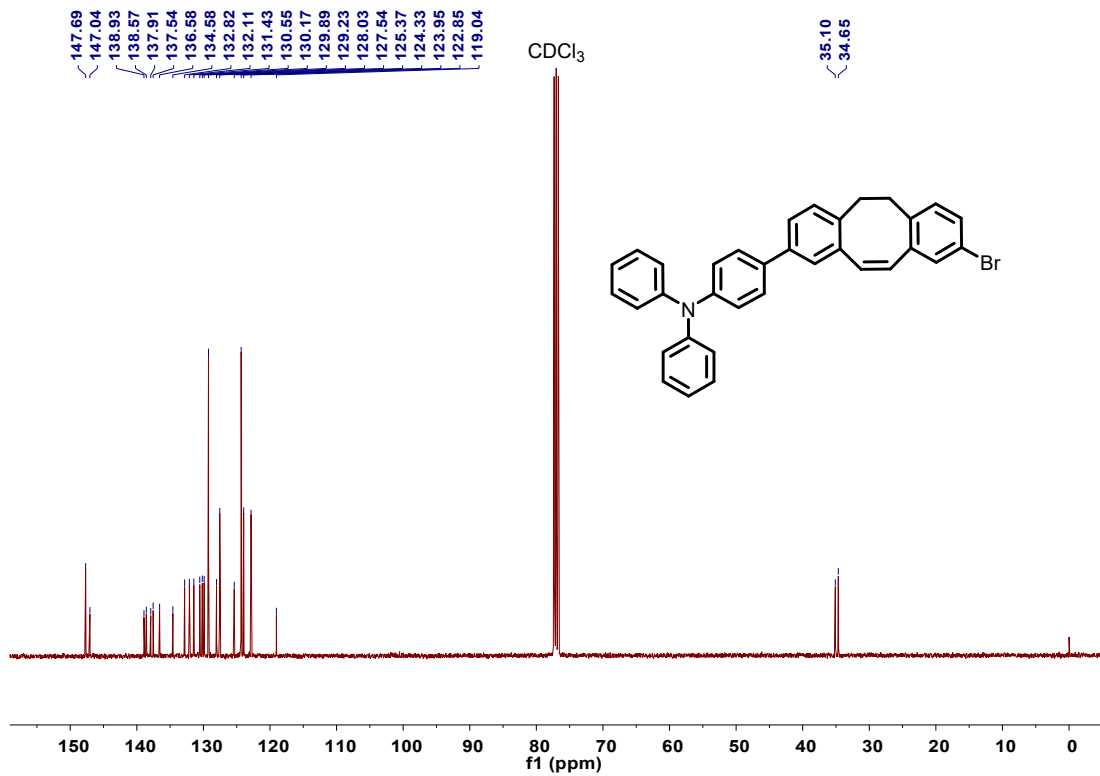

Figure S24.  $^{13}\text{C}$  NMR (101 MHz,  $\text{CDCl}_3$ ) spectrum of 13.

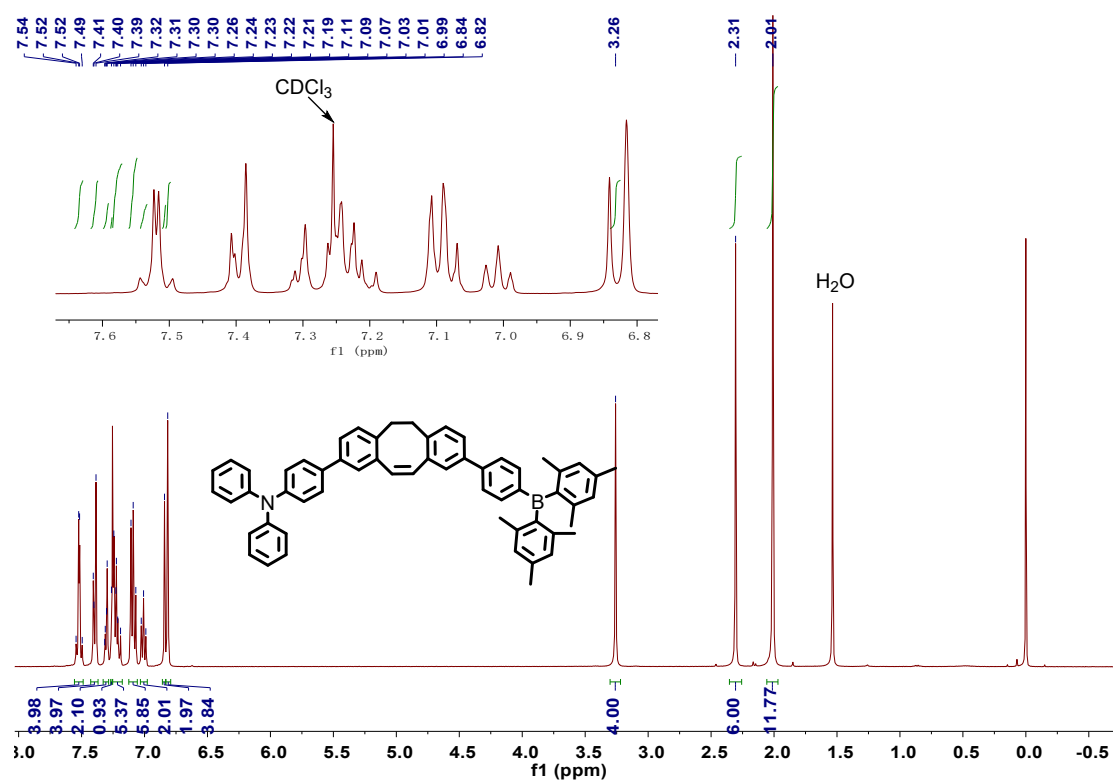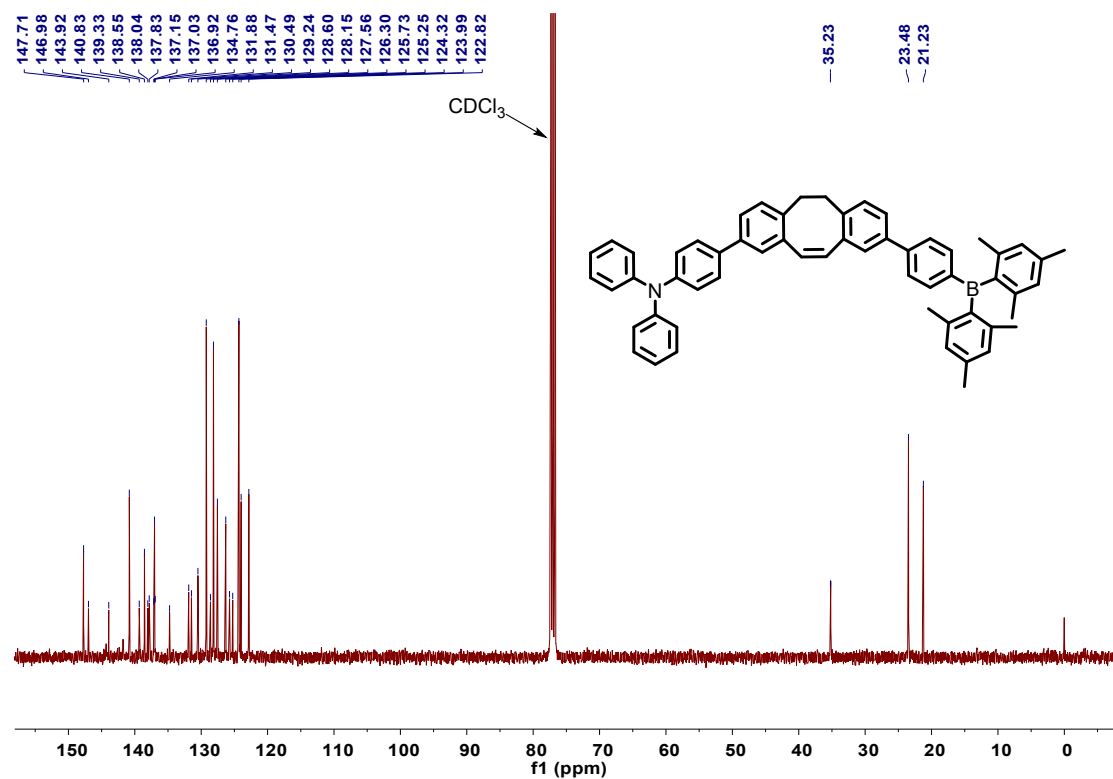

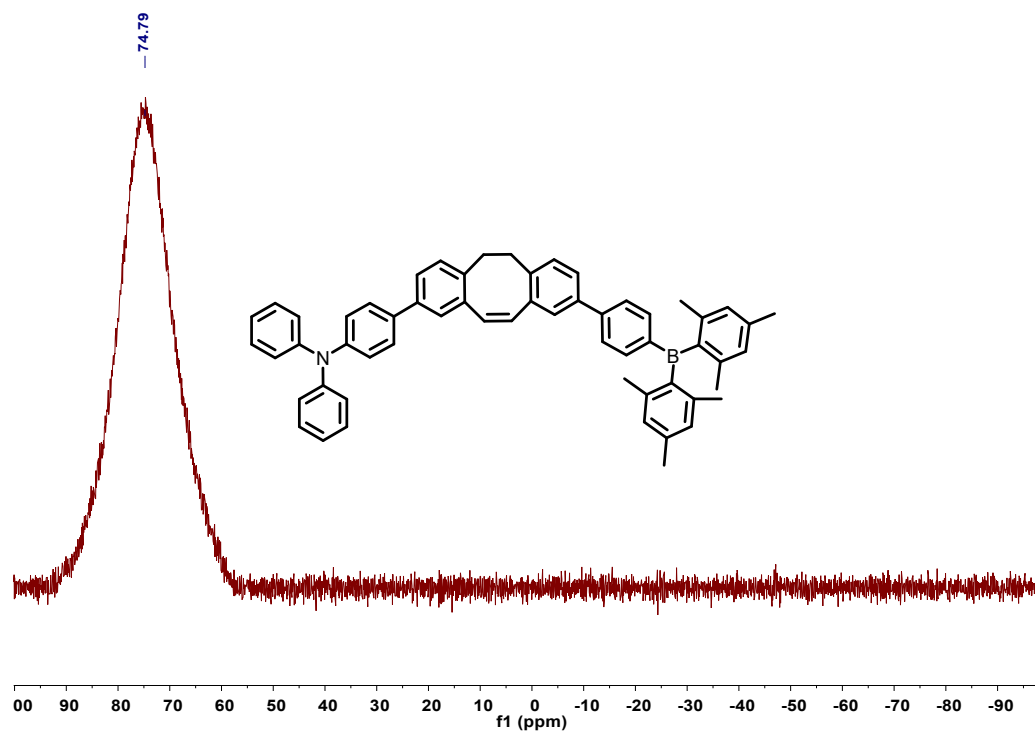

**Figure S27.**  $^{11}\text{B}$  NMR (225 MHz,  $\text{C}_6\text{D}_6$ ) spectrum of M2.

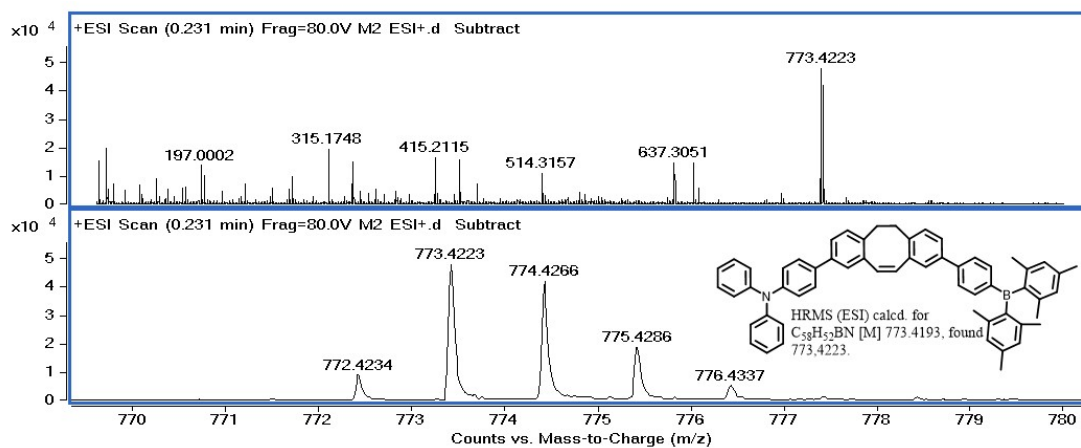

**Figure S28.** HRMS spectrum for M2.

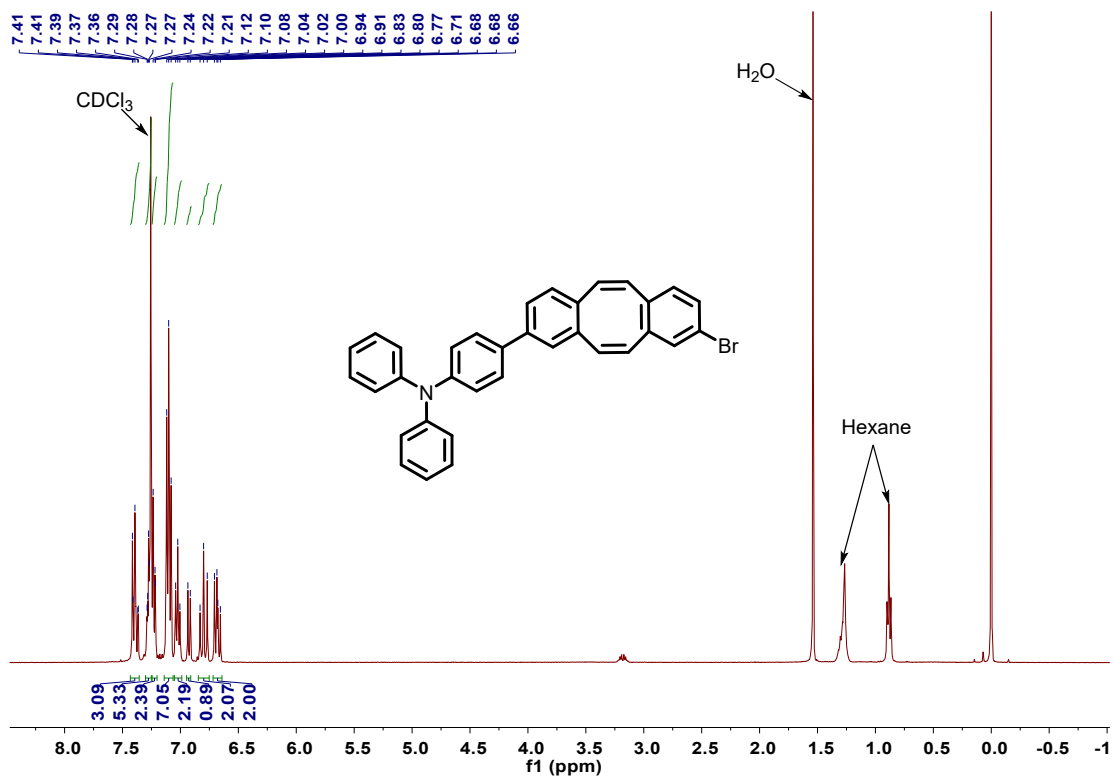

Figure S29. <sup>1</sup>H NMR (400 MHz, CDCl<sub>3</sub>) spectrum of 14.

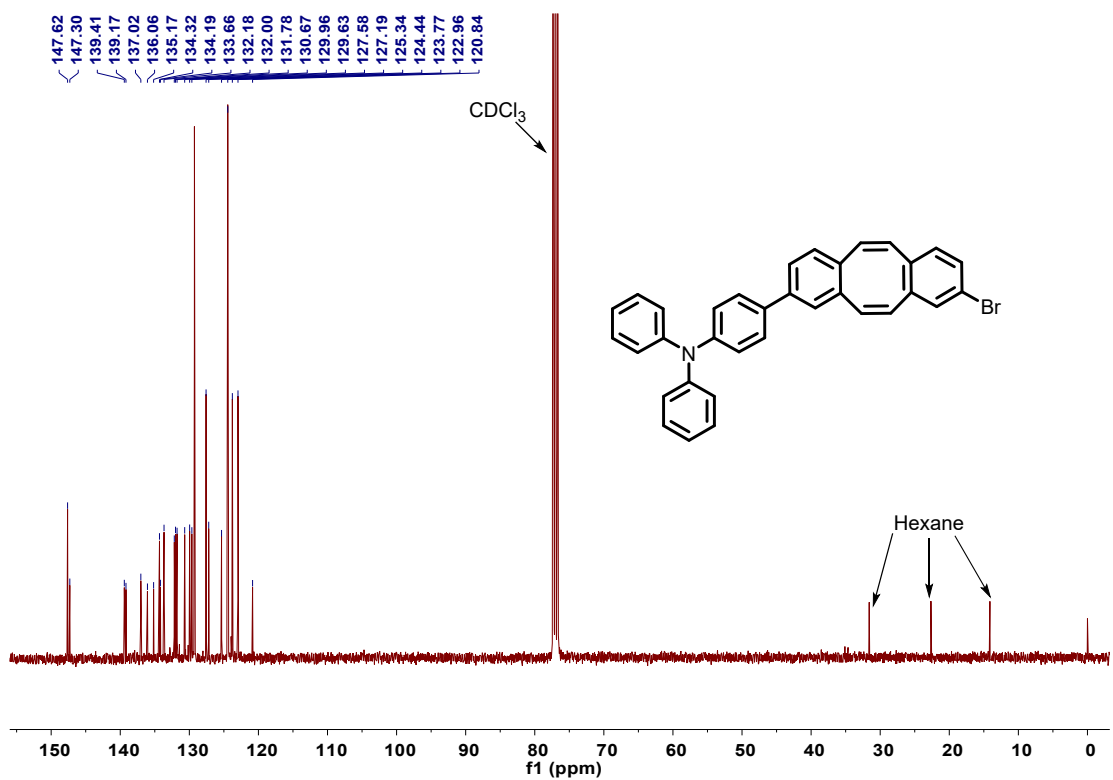

Figure S30. <sup>13</sup>C NMR (101 MHz, CDCl<sub>3</sub>) spectrum of 14.



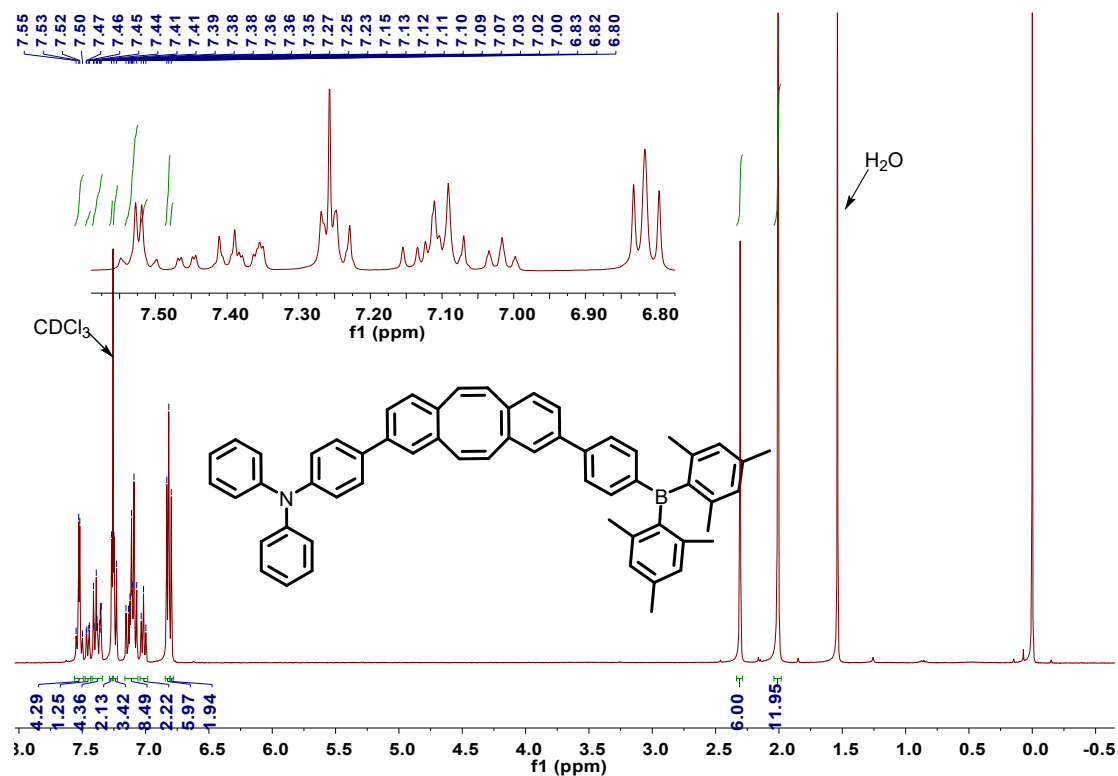

Figure S31.  $^1\text{H}$  NMR (400 MHz,  $\text{CDCl}_3$ ) spectrum of M3.

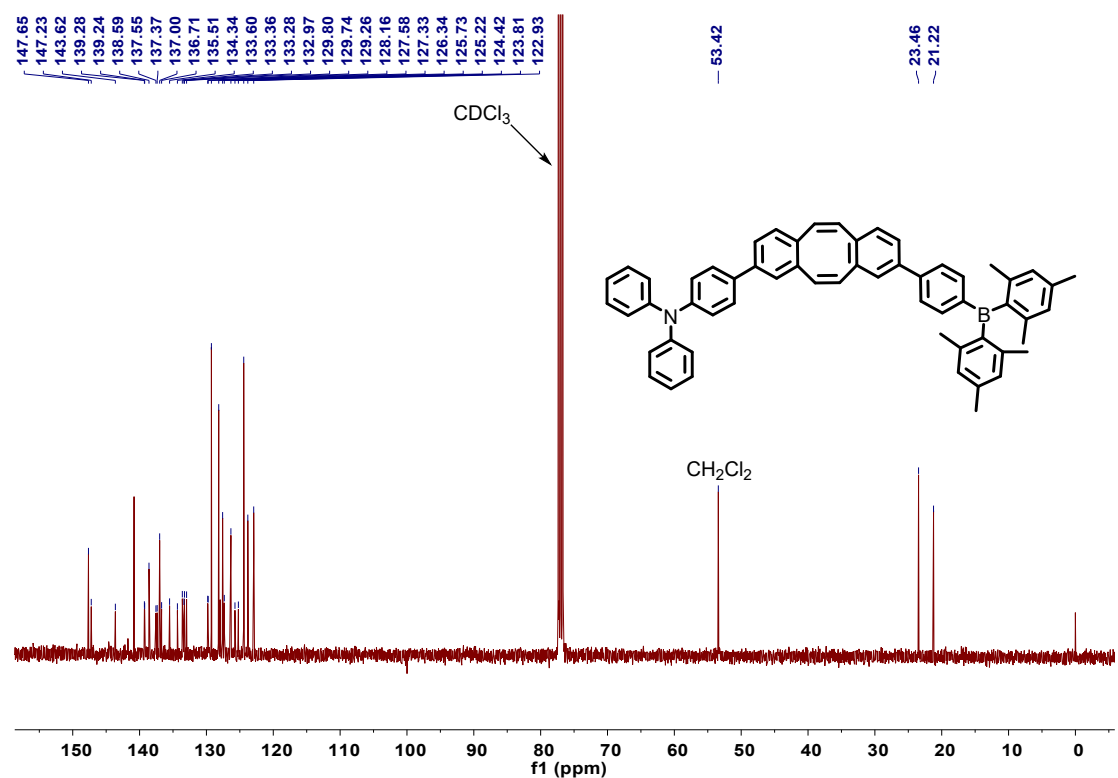

Figure S32.  $^{13}\text{C}$  NMR (101 MHz,  $\text{CDCl}_3$ ) spectrum of M3.

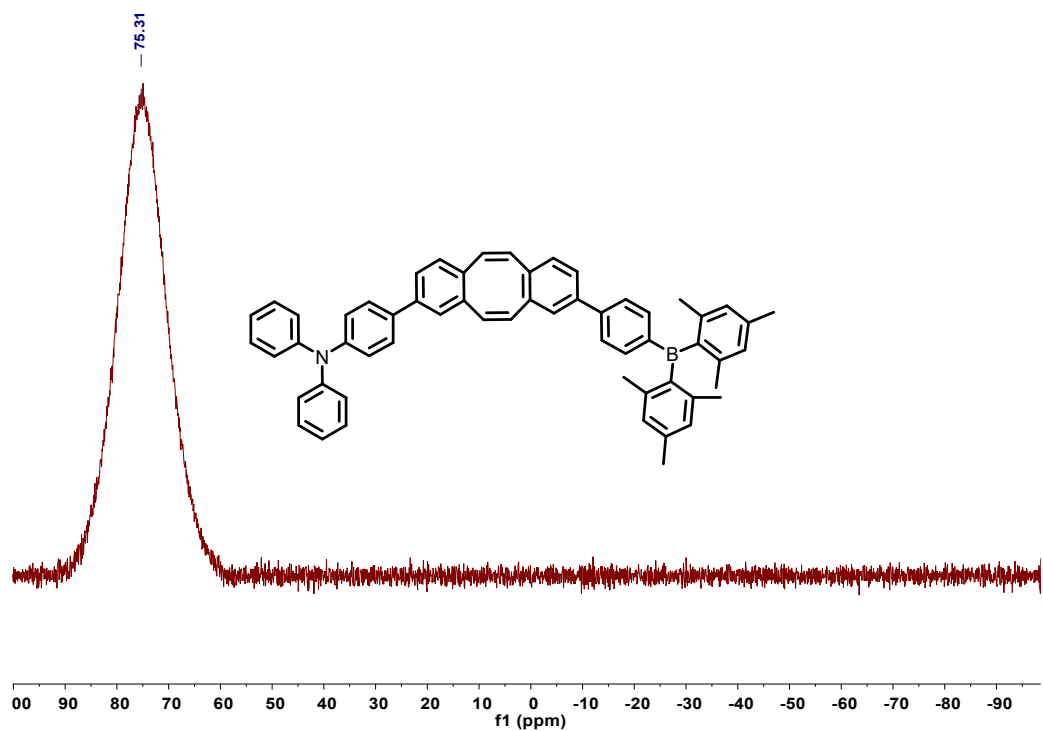

re S33.  $^{11}\text{B}$  NMR (225 MHz,  $\text{C}_6\text{D}_6$ ) spectrum of **M3**.

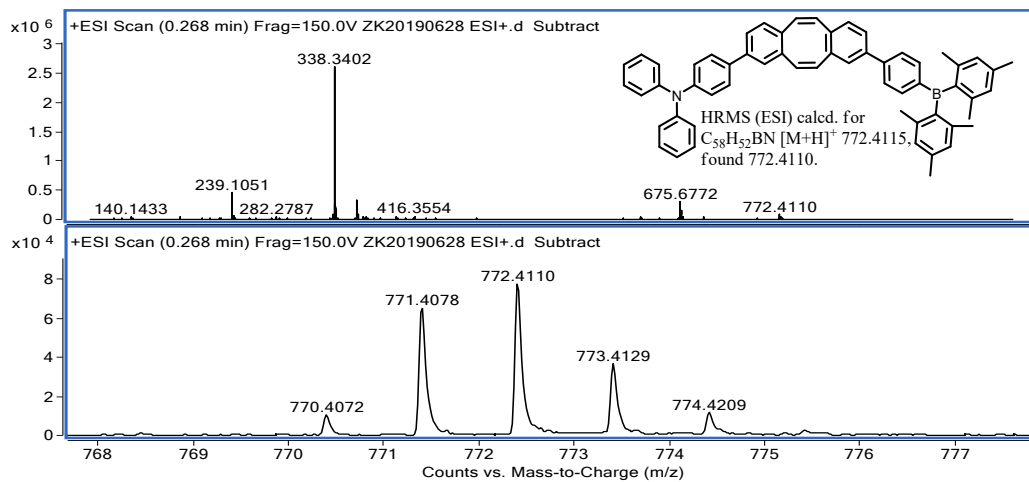

Figure S34. HRMS spectrum for **M3**.

## 4. XRD Measurements

**Table S1.** Crystallographic data and structure refinement for **M2**.

| Compound                                      | M2                                                                                                        |
|-----------------------------------------------|-----------------------------------------------------------------------------------------------------------|
| Empirical formula                             | C <sub>58</sub> H <sub>52</sub> BN                                                                        |
| Formula weight                                | 773.81                                                                                                    |
| Temperature/K                                 | 180.0                                                                                                     |
| Crystal system                                | triclinic                                                                                                 |
| Space group                                   | P-1                                                                                                       |
| Unit cell                                     | a = 11.6873(6) Å; b = 13.6233(7) Å; c = 17.5745(10) Å.<br>α = 74.330(2)°; β = 74.445(2)°; γ = 67.948(2)°. |
| Volume/Å <sup>3</sup>                         | 2453.1(2)                                                                                                 |
| Z                                             | 2                                                                                                         |
| ρ <sub>calc</sub> /cm <sup>3</sup>            | 1.048                                                                                                     |
| μ/mm <sup>-1</sup>                            | 0.059                                                                                                     |
| F (000)                                       | 824.0                                                                                                     |
| Crystal size/mm <sup>3</sup>                  | 0.41 × 0.26 × 0.22                                                                                        |
| Radiation                                     | MoKα (λ = 0.71073)                                                                                        |
| 2θ range for data collection/°                | 4.9 to 50                                                                                                 |
| Index ranges                                  | -13 ≤ h ≤ 13, -16 ≤ k ≤ 16, -20 ≤ l ≤ 20                                                                  |
| Reflections collected                         | 27498                                                                                                     |
| Independent reflections                       | 8569 [R <sub>int</sub> = 0.0456, R <sub>sigma</sub> = 0.0537]                                             |
| Data/restraints/parameters                    | 8569/0/547                                                                                                |
| Goodness-of-fit on F <sup>2</sup>             | 1.031                                                                                                     |
| Final R indexes [I ≥ 2σ (I)]                  | R <sub>1</sub> = 0.0515, wR <sub>2</sub> = 0.1251                                                         |
| Final R indexes [all data]                    | R <sub>1</sub> = 0.0857, wR <sub>2</sub> = 0.1441                                                         |
| Largest diff. peak/hole (e. Å <sup>-3</sup> ) | 0.22/-0.26                                                                                                |

**Table S2.** Selected bond distances (Å) from X-ray data for **M2**.

| Bond       | Bond Length/Å | Bond        | Length/Å |
|------------|---------------|-------------|----------|
| N(1)-C(4)  | 1.421(3)      | B(1)- C(20) | 1.561(3) |
| N(1)-C(5)  | 1.418(2)      | B(1)- C(22) | 1.581(3) |
| N(1)-C(30) | 1.416(3)      | B(1)- C(37) | 1.578(3) |

**Table S3.** Selected bond angles (°) from X-ray data for **M2**.

| Bond Angle      |            | Bond Angle       |            |
|-----------------|------------|------------------|------------|
| C(5)-N(1)-C(4)  | 119.23(16) | C(20)-B(1)-C(22) | 118.96(17) |
| C(30)-N(1)-C(4) | 119.00(16) | C(20)-B(1)-C(37) | 117.65(17) |
| C(30)-N(1)-C(5) | 120.04(17) | C(37)-B(1)-C(22) | 123.37(17) |

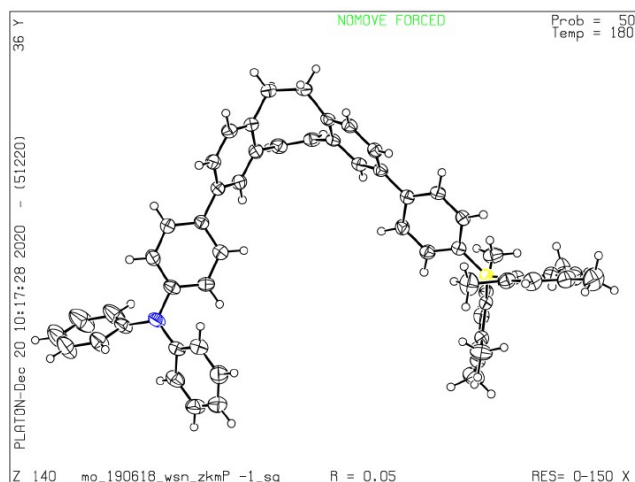

**Figure S35.** X-ray crystal structure of **M2** (50% thermal ellipsoids). Color code: N (Blue) and B (yellow).

## 5. Spectral characterization

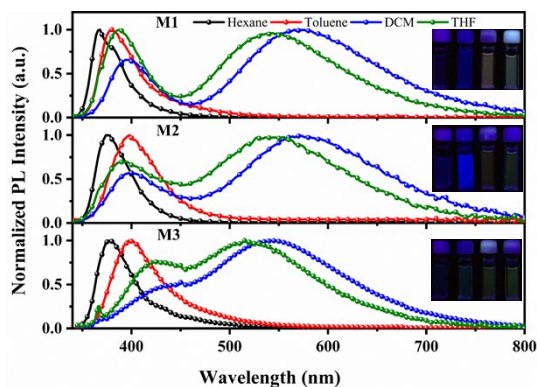

**Figure S36.** Emission spectra of **M1**, **M2** and **M3** in solvents ( $1.0 \times 10^{-5}$  M) of different polarity in air at 298 K.

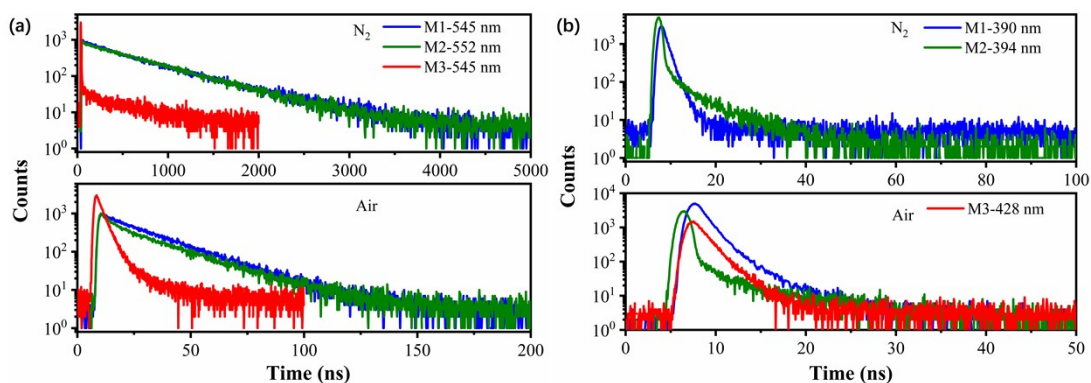

**Figure S37.** PL decay curves of **M1**, **M2** and **M3** in THF ( $1.0 \times 10^{-5}$  M) under  $N_2$  and air atmosphere at 298 K.

**Table S4.** Summary of absorption and emission properties of **M1**, **M2** and **M3** in THF ( $1.0 \times 10^{-5}$  M) under  $N_2$  at 298 K.

|           | $\lambda_{\text{abs}}$ [nm] | $\lambda_{\text{em}}$ [nm] | $\Phi_{\text{PL}}$ (%) | $\tau$ [ns] |          |                      | Rel %       | $\chi^2$ |
|-----------|-----------------------------|----------------------------|------------------------|-------------|----------|----------------------|-------------|----------|
|           |                             |                            |                        | $\tau_1$    | $\tau_2$ | $\tau_{\text{ave.}}$ |             |          |
| <b>M1</b> | 329                         | 390                        | 15                     | 1.34        |          | 1.34                 | 100         | 1.297    |
|           |                             | 545                        |                        | 254.70      | 727.80   | 640.47               | 18.46/81.54 | 1.029    |
| <b>M2</b> | 331                         | 394                        | 10                     | 0.30        | 3.88     | 2.04                 | 51.52/48.48 | 1.15     |
|           |                             | 552                        |                        | 319.60      | 549.80   | 527.81               | 9.55/90.45  | 1.083    |
| <b>M3</b> | 331                         | 545                        | 3                      | 4.00        | 555.80   | 349.81               | 37.33/62.67 | 1.214    |

**Table S5.** Summary of emission photophysical properties of **M1**, **M2** and **M3** in THF ( $1.0 \times 10^{-5}$  M) under air at 298 K.

|           | $\lambda_{\text{em}}$ [nm] | $\Phi_{\text{PL}}$ (%) | $\tau$ [ns] |          |                      | Rel %       | $\chi^2$ |
|-----------|----------------------------|------------------------|-------------|----------|----------------------|-------------|----------|
|           |                            |                        | $\tau_1$    | $\tau_2$ | $\tau_{\text{ave.}}$ |             |          |
| <b>M1</b> | 390                        | 3                      | 1.14        | 3.33     | 1.63                 | 77.98/22.02 | 1.09     |
|           | 545                        |                        | 20.52       |          | 20.52                | 100         | 1.294    |
| <b>M2</b> | 394                        | 1                      | 0.36        | 6.18     | 2.86                 | 57.08/42.92 | 1.248    |
|           | 552                        |                        | 4.18        | 22.32    | 20.01                | 12.74/82.26 | 1.116    |
| <b>M3</b> | 428                        | 1                      | 1.40        | 2.95     | 1.53                 | 87.77/12.23 | 1.255    |
|           | 545                        |                        | 2.79        | 11.48    | 3.83                 | 89.23/10.77 | 1.197    |

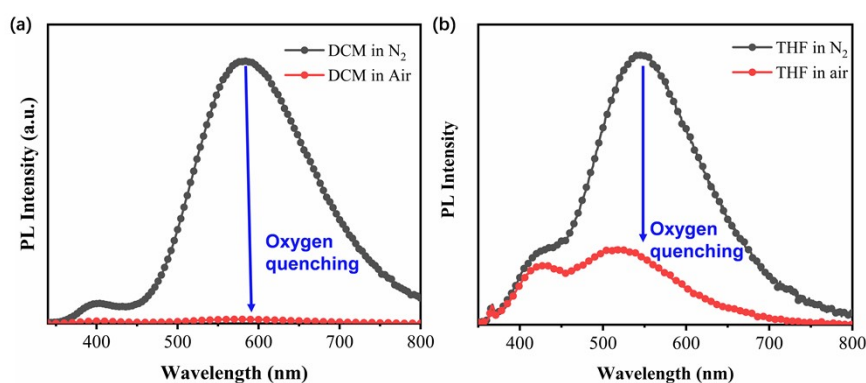

**Figure S38.** PL spectra of (a) **M2** (in DCM,  $1.0 \times 10^{-5}$  M), and (b) **M3** (in THF,  $1.0 \times 10^{-5}$  M) under  $N_2$  and air atmosphere at 298 K.

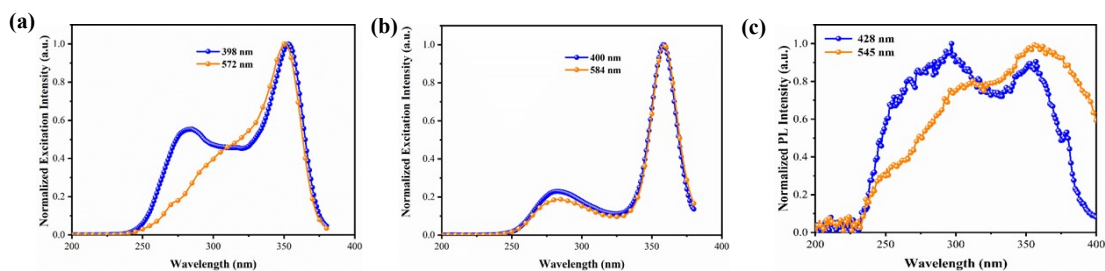

**Figure S39.** Excitation spectra of (a) **M1** (in DCM,  $1.0 \times 10^{-5}$  M) and (b) **M2** (in DCM,  $1.0 \times 10^{-5}$  M), and (c) **M3** (in THF,  $1.0 \times 10^{-5}$  M) under  $N_2$  at 298 K.

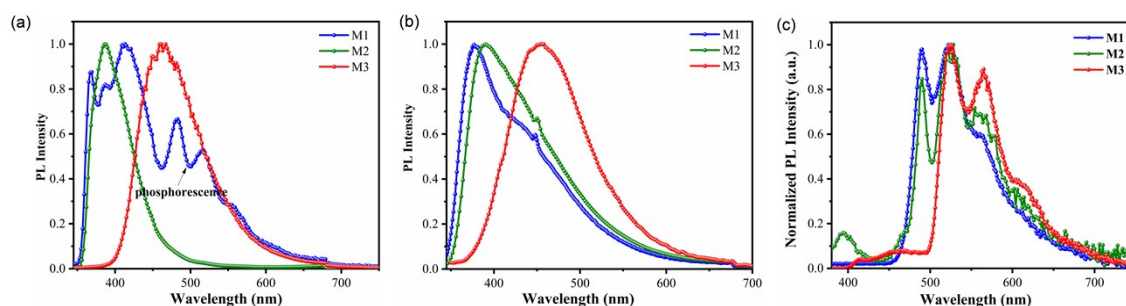

**Figure S40.** PL spectra of **M1**, **M2** and **M3** (a) in MTHF at 77 K and (b) 5% PMMA doped films, (c) phosphorescence spectra (77 K) in MTHF.

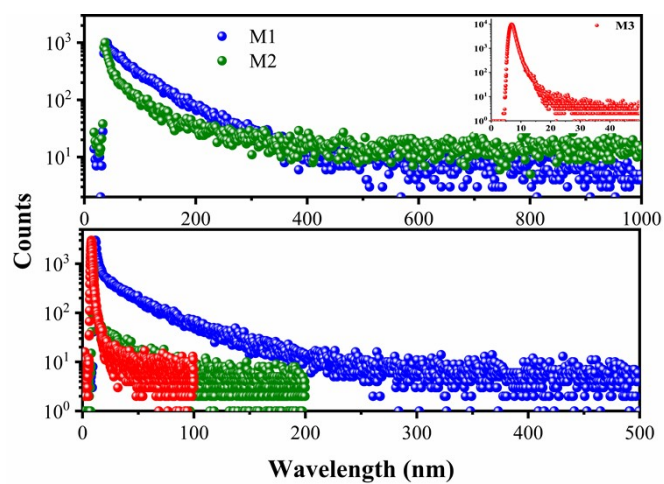

**Figure S41.** Transient PL decays of **M1**, **M2** and **M3** solid powder (top) and crystalline sample (bottom) in air at 298 K.

**Table S6.** PL decay curves of **M1**, **M2** and **M3** of solid powder (top) and crystalline sample (bottom) in air.

|                    |           | $\lambda_{\text{max}}$<br>[nm] | $\Phi_{\text{PL}}$<br>(%) | $\tau$ [ns] |          |          |                      | Rel %             | $\chi^2$ |
|--------------------|-----------|--------------------------------|---------------------------|-------------|----------|----------|----------------------|-------------------|----------|
|                    |           |                                |                           | $\tau_1$    | $\tau_2$ | $\tau_3$ | $\tau_{\text{ave.}}$ |                   |          |
| solid powder       | <b>M1</b> | 445                            | 20                        | 27.25       | 79.90    |          | 68.40                | 21.84/78.16       | 1.132    |
|                    | <b>M2</b> | 432                            | 18                        | 8.52        | 66.06    |          | 51.03                | 26.12/73.88       | 1.151    |
|                    | <b>M3</b> | 448                            | 5                         | 0.74        | 2.06     | 16.85    | 1.45                 | 70.31/27.51/2.18  | 1.168    |
| Crystalline sample | <b>M1</b> | 430                            | 22                        | 1.51        | 15.74    | 51.50    | 34.08                | 14.71/28.15/57.14 | 1.112    |
|                    | <b>M2</b> | 425                            | 20                        | 1.06        | 27.14    |          | 15.67                | 43.99/56.01       | 1.225    |
|                    | <b>M3</b> | 460                            | 6                         | 0.79        | 3.02     | 24.46    | 3.95                 | 61.09/28.24/10.67 | 1.275    |

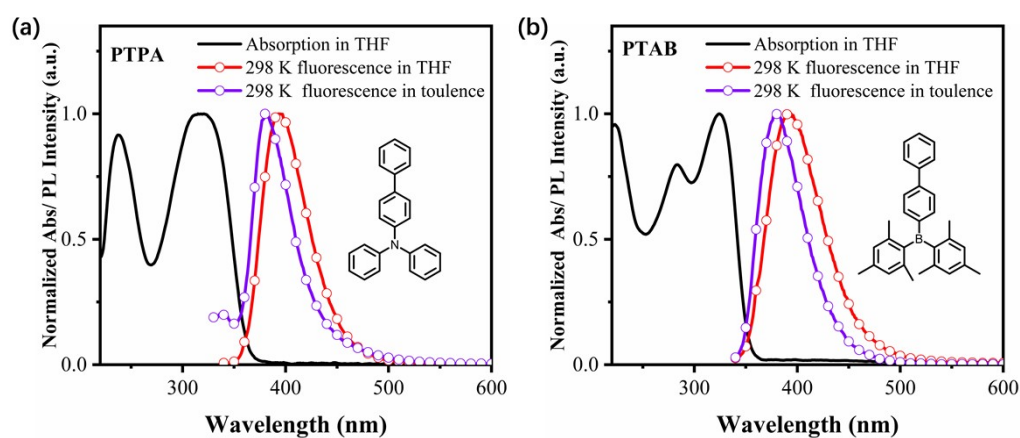

**Figure S42.** Absorption and emission spectra of **PTPA** and **PTAB** in THF and toluene ( $1 \times 10^{-5}$  M) under  $\text{N}_2$  at 298 K.

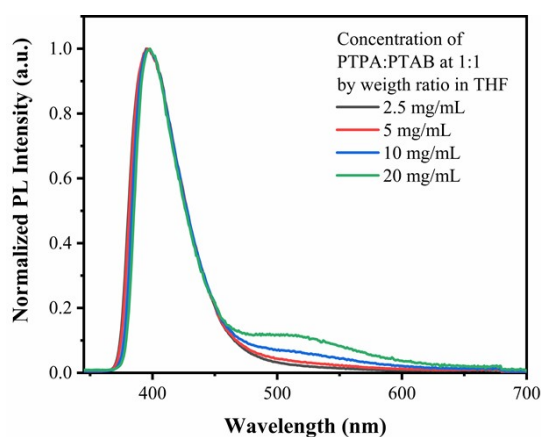

**Figure S43.** PL spectra of **PTPA/PTAB** mixture in THF with different concentrations under  $\text{N}_2$  at 298 K.

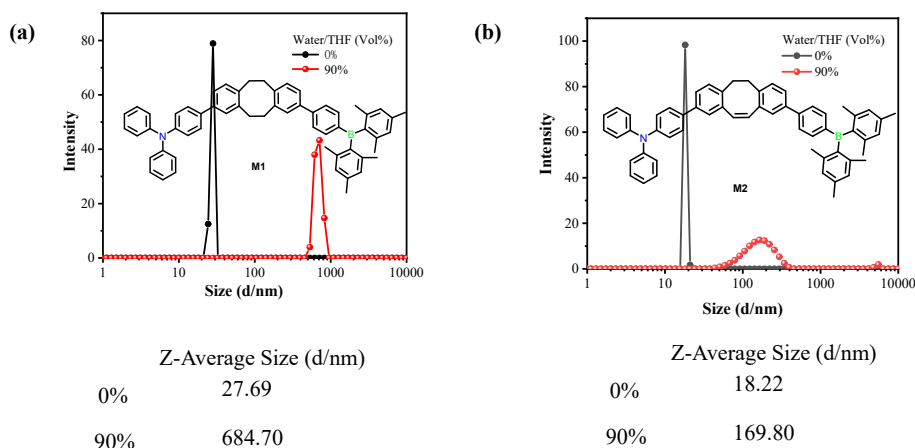

**Figure S44.** Dynamic Light Scattering (DLS) spectra of (a) **M1** and (b) **M2**.

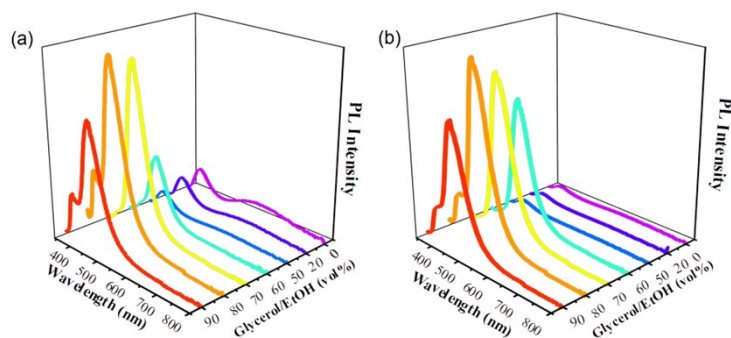

|           | 0%      | 20%     | 50%     | 60% | 70% | 80%     | 90%     |
|-----------|---------|---------|---------|-----|-----|---------|---------|
| <b>M1</b> | 391/605 | 391/625 | 394/624 | 446 | 445 | 372/445 | 372/445 |
| <b>M2</b> | 390/624 | 390/635 | 392/670 | 445 | 449 | 383/449 | 383/445 |

**Figure S45.** PL spectra of (a) **M1** and (b) **M2** in EtOH-glycerol mixtures ( $1.0 \times 10^{-5}$  M) under  $N_2$  at 298 K.

**Table S7.** Temperature-dependent photophysical properties and fitting results of temperature-dependent transient decay spectra of **M1** in MTHF (0.03 mM) under  $N_2$ .

| T [K] | $\lambda_{\max}$ [nm] | $\tau$ [ns] |          |                      | Rel %       | $\chi^2$ | CIE [x,y]   |
|-------|-----------------------|-------------|----------|----------------------|-------------|----------|-------------|
|       |                       | $\tau_1$    | $\tau_2$ | $\tau_{\text{ave.}}$ |             |          |             |
| 150   | 628                   | 2.99        | 598.40   | 584.83               | 2.28/97.72  | 1.177    | [0.53,0.39] |
| 180   | 608                   | 196.40      | 925.40   | 786.37               | 19.07/80.93 | 1.225    | [0.52,0.44] |
| 210   | 575                   | 20.00       | 775.30   | 767.24               | 1.07/98.93  | 1.240    | [0.45,0.50] |
| 270   | 538                   | 13.41       | 658.00   | 653.65               | 0.67/99.33  | 1.102    | [0.30,0.50] |



|     |     |       |        |        |            |       |             |
|-----|-----|-------|--------|--------|------------|-------|-------------|
| 300 | 518 | 3.90  | 503.10 | 499.97 | 0.63/99.37 | 0.906 | [0.28,0.44] |
| 330 | 497 | 10.00 | 365.9  | 364.06 | 0.52/99.48 | 1.132 | [0.23,0.36] |
| 345 | 491 | 10.00 | 307.9  | 304.94 | 0.99/99.01 | 1.175 | [0.21,0.32] |

**Table S8.** Temperature-dependent photophysical properties and fitting results of temperature-dependent transient decay spectra of **M2** in MTHF (0.03 mM) under N<sub>2</sub>.

| T [K] | $\lambda_{\max}$ [nm] | $\tau$ [ns] |          |                      | Rel %      | $\chi^2$ | CIE [x,y]   |
|-------|-----------------------|-------------|----------|----------------------|------------|----------|-------------|
|       |                       | $\tau_1$    | $\tau_2$ | $\tau_{\text{ave.}}$ |            |          |             |
| 150   | 650                   | 20          | 456.1    | 451.75               | 1/99       | 1.116    | [0.52,0.34] |
| 180   | 620                   | 20          | 724.8    | 719.97               | 0.68/99.32 | 1.113    | [0.52,0.43] |
| 210   | 590                   | 10.46       | 953.1    | 948.57               | 0.48/99.52 | 1.180    | [0.48,0.48] |
| 240   | 560                   | 24.06       | 874.7    | 869.72               | 0.58/99.42 | 1.136    | [0.42,0.51] |
| 270   | 545                   | 5.34        | 622.0    | 618.48               | 0.57/99.43 | 1.011    | [0.35,0.49] |
| 300   | 521                   | 2.37        | 431.0    | 428.25               | 0.64/99.36 | 1.091    | [0.28,0.43] |
| 330   | 502                   | 2.39        | 276.8    | 267.55               | 3.37/96.63 | 0.927    | [0.22,0.31] |
| 345   | 474                   | 2.98        | 196.2    | 190.24               | 3.08/96.92 | 1.079    | [0.20,0.24] |

**Table S9.** Temperature-dependent photophysical properties and fitting results of temperature-dependent transient decay spectra of **M3** in MTHF (0.03 mM) under N<sub>2</sub>.

| T [K] | $\lambda_{\max}$ [nm] | $\tau$ [ns] |          |                      | Rel %       | $\chi^2$ | CIE [x,y]   |
|-------|-----------------------|-------------|----------|----------------------|-------------|----------|-------------|
|       |                       | $\tau_1$    | $\tau_2$ | $\tau_{\text{ave.}}$ |             |          |             |
| 150   | 630                   | 6.66        | 337.1    | 182.62               | 46.75/53.25 | 1.372    | [0.46,0.38] |
| 180   | 615                   | 5.97        | 570.30   | 314.51               | 45.33/54.67 | 1.191    | [0.46,0.40] |
| 210   | 582                   | 4.44        | 700.60   | 407.34               | 42.13/57.87 | 1.229    | [0.44,0.45] |
| 240   | 560                   | 3.90        | 707.60   | 444.76               | 37.35/62.65 | 1.151    | [0.39,0.48] |
| 270   | 535                   | 3.57        | 546.10   | 332.85               | 39.31/60.69 | 1.029    | [0.33,0.46] |
| 300   | 518                   | 3.07        | 360.40   | 201.75               | 44.40/55.60 | 1.023    | [0.27,0.41] |
| 330   | 495                   | 2.63        | 222.20   | 110.09               | 51.05/48.95 | 1.056    | [0.22,0.31] |
| 345   | 485                   | 2.48        | 174.10   | 74.72                | 57.91/42.09 | 1.073    | [0.20,0.25] |

## 6. Spectroscopic Tracking by $^1\text{H}$ NMR Measurements

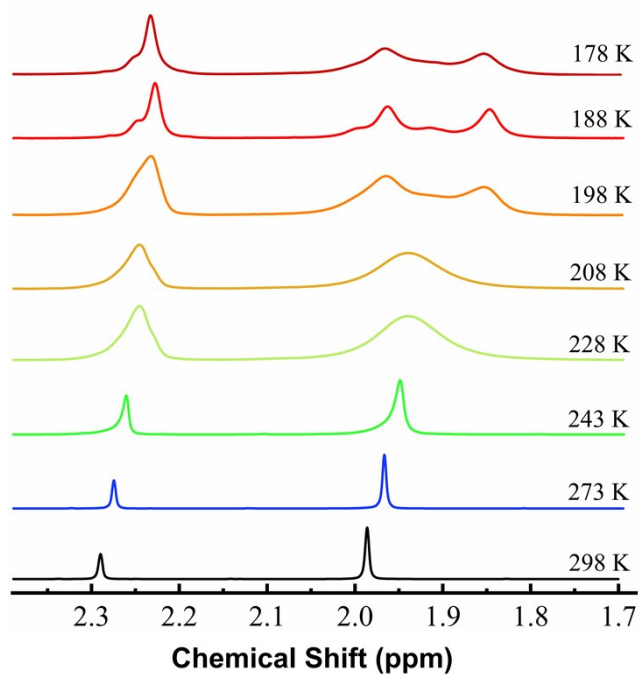

**Figure S46.** Variable-temperature  $^1\text{H}$  NMR spectra of the methyl protons on  $\text{Ar}_3\text{B}$  of **M1** in  $\text{CD}_2\text{Cl}_2\text{-CS}_2$  (4:1) at various temperatures

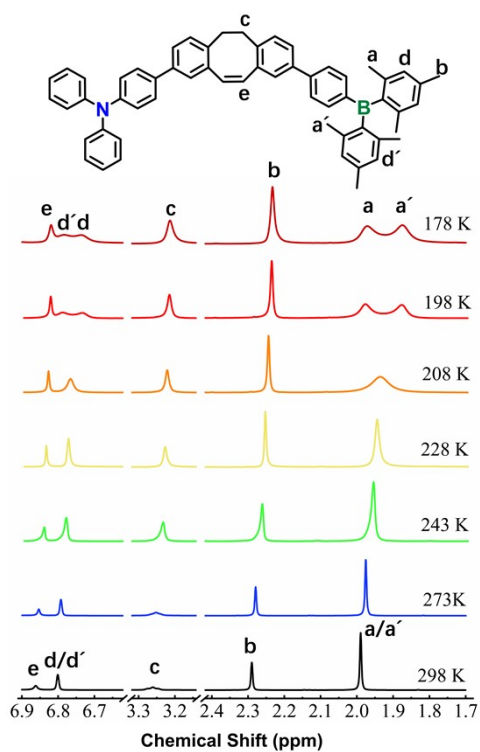

**Figure S47.** Variable-temperature  $^1\text{H}$  NMR spectra of **M2** in  $\text{CD}_2\text{Cl}_2\text{-CS}_2$  (4:1) at various temperatures.

## 7. Transient absorption spectroscopy

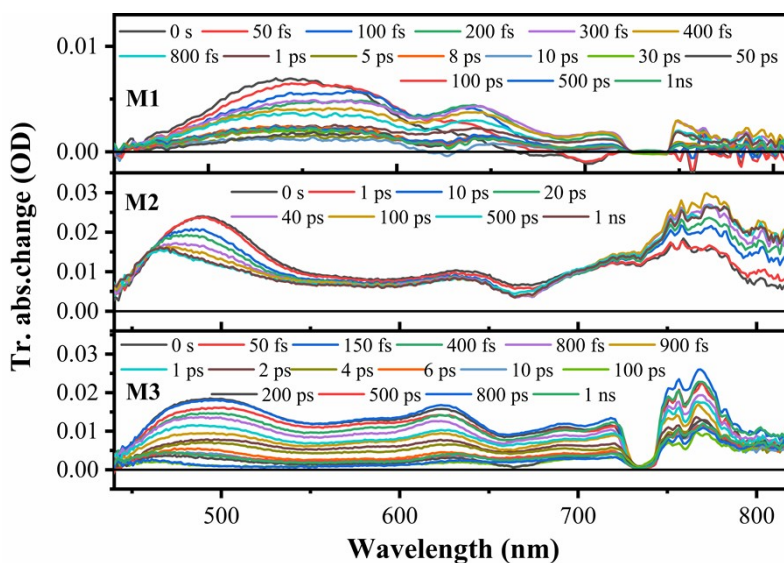

**Figure S48.** Femtosecond time-resolved absorption spectra of **M1**, **M2** and **M3** in MTHF at selected delay times, obtained upon 330 nm photoexcitation.

## 8. DFT and TD-DFT Computations

DFT and TD-DFT calculations were performed using the Gaussian 09 suite of programs.<sup>[3]</sup> Geometry optimizations and vertical excitations of all compounds were obtained at the B3LYP/6-31G\*, CAM-B3LYP/6-31G\* and B3LYP/6-311G\*\* level of theory,<sup>[4,5]</sup> and the resulting structures were confirmed to be stationary points through vibrational frequency analysis.

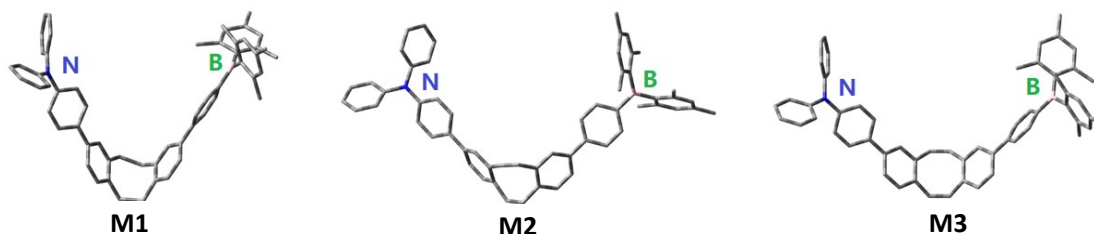

**Figure S49.** DFT optimized structures of **M1**-**M3** (B3LYP/6-31G\*).

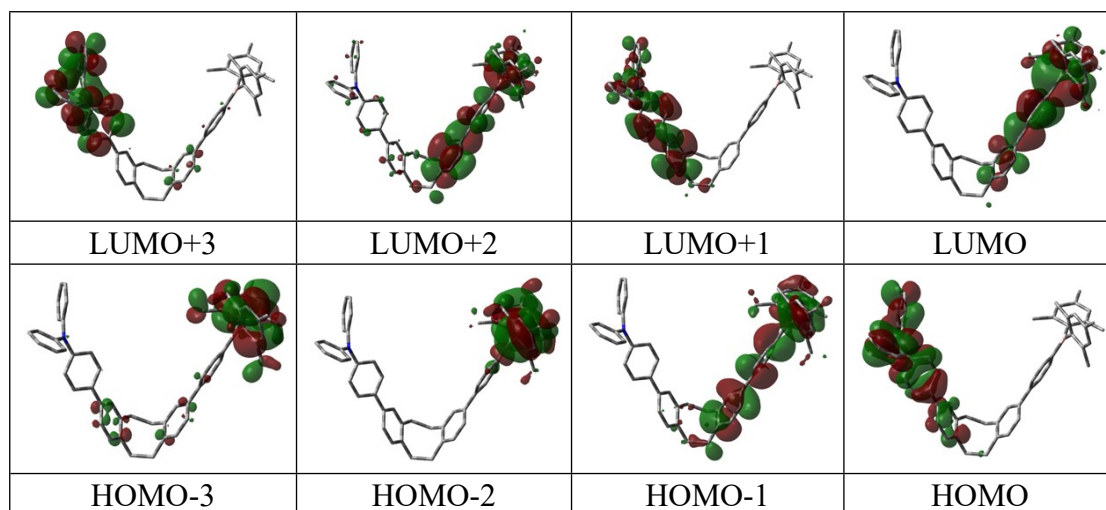

**Figure S50.** Molecular orbitals contributing to the DFT calculated transitions of **M1** (iso = 0.02, B3LYP/6-31G\*).

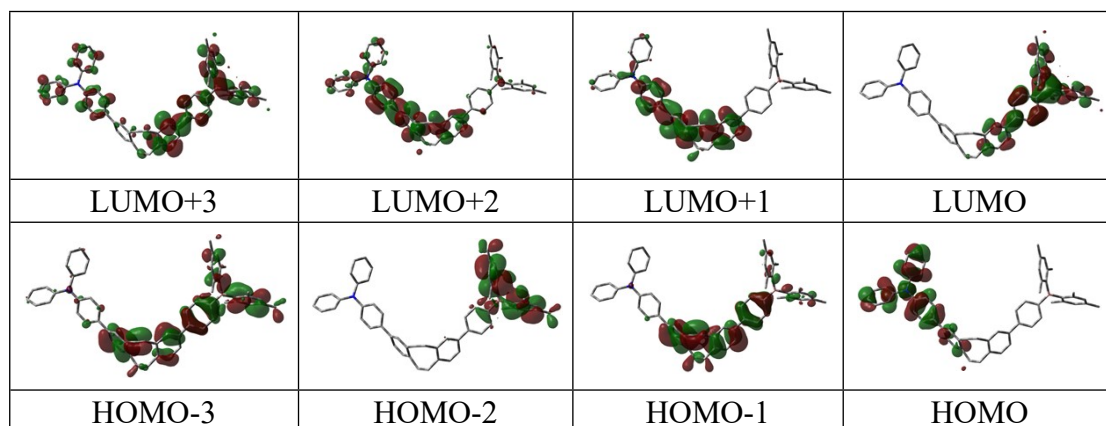

**Figure S51.** Molecular orbitals contributing to the DFT calculated transitions of **M2** (iso = 0.02, B3LYP/6-31G\*).

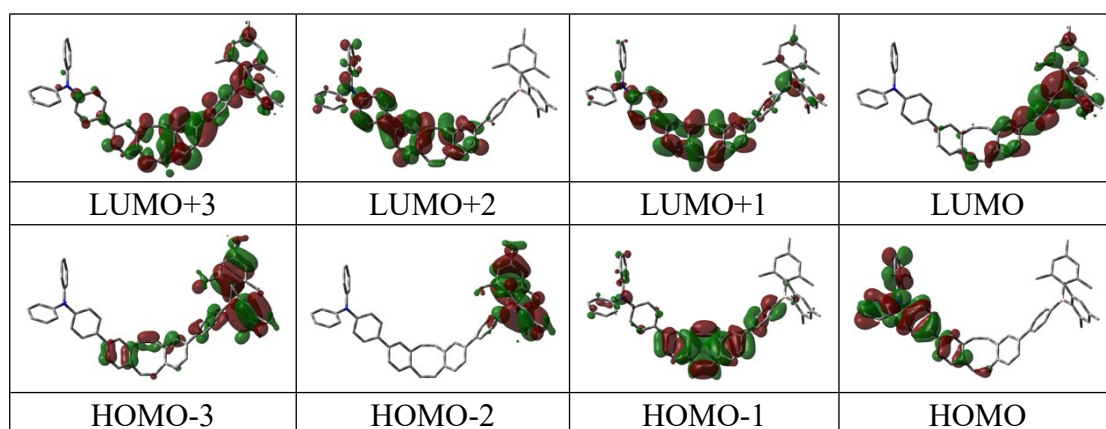

**Figure S52.** Molecular orbitals contributing to the DFT calculated transitions of **M3** (iso = 0.02, B3LYP/6-31G\*).

**Table S10.** Comparison of the TD-DFT calculations (B3LYP, 6-311G\*\*) for **M1–M3**.

| Compound  | Transition                     | $\lambda$ , nm (eV) | Oscillator Strength, $f$ | Orbital Contributions                                       |
|-----------|--------------------------------|---------------------|--------------------------|-------------------------------------------------------------|
| <b>M1</b> | S <sub>0</sub> →S <sub>1</sub> | 421 (2.95)          | 0.0007                   | HOMO→LUMO (100%)                                            |
|           | S <sub>0</sub> →S <sub>2</sub> | 352 (3.52)          | 0.0733                   | HOMO-2→LUMO (96%)                                           |
|           | S <sub>0</sub> →S <sub>3</sub> | 349 (3.55)          | 0.3948                   | HOMO-1→LUMO (46%)<br>HOMO→LUMO+1 (42%)                      |
|           | S <sub>0</sub> →S <sub>4</sub> | 343 (3.62)          | 0.5457                   | HOMO-3→LUMO (12%)<br>HOMO-1→LUMO (27%)<br>HOMO→LUMO+1 (53%) |
|           | S <sub>0</sub> →S <sub>5</sub> | 334 (3.71)          | 0.0793                   | HOMO-3→LUMO (76%)                                           |
| <b>M2</b> | S <sub>0</sub> →S <sub>1</sub> | 415 (2.99)          | 0.0000                   | HOMO→LUMO (100%)                                            |
|           | S <sub>0</sub> →S <sub>2</sub> | 357 (3.47)          | 0.2313                   | HOMO-2→LUMO (35%)<br>HOMO→LUMO+1 (56%)                      |
|           | S <sub>0</sub> →S <sub>3</sub> | 357 (3.47)          | 0.3627                   | HOMO-2→LUMO (61%)<br>HOMO→LUMO+1 (29%)                      |
|           | S <sub>0</sub> →S <sub>4</sub> | 348 (3.56)          | 0.3025                   | HOMO-3→LUMO (41%)<br>HOMO-1→LUMO (36%)                      |
|           | S <sub>0</sub> →S <sub>5</sub> | 336 (3.69)          | 0.1237                   | HOMO-4→LUMO (69%)                                           |
| <b>M3</b> | S <sub>0</sub> →S <sub>1</sub> | 426 (2.91)          | 0.0782                   | HOMO→LUMO (97%)                                             |
|           | S <sub>0</sub> →S <sub>2</sub> | 375 (3.30)          | 0.5062                   | HOMO-1→LUMO (12%)<br>HOMO→LUMO+1 (80%)                      |
|           | S <sub>0</sub> →S <sub>3</sub> | 360 (3.44)          | 0.0934                   | HOMO-2→LUMO (86%)                                           |
|           | S <sub>0</sub> →S <sub>4</sub> | 359 (3.45)          | 0.3557                   | HOMO-1→LUMO (62%)<br>HOMO→LUMO+1 (14%)                      |
|           | S <sub>0</sub> →S <sub>5</sub> | 343 (3.61)          | 0.0039                   | HOMO-3→LUMO (75%)                                           |

**Table S11.** Coordinates (Å) for the optimized structure (B3LYP, 6-31G\*) of **M1**.

| atom | X        | Y        | Z         | atom | X        | Y        | Z        |
|------|----------|----------|-----------|------|----------|----------|----------|
| C    | 0.307328 | 5.174501 | -1.81485  | H    | 3.498877 | 3.164358 | 1.380381 |
| C    | 1.219795 | 4.125619 | -1.75190  | H    | 5.070789 | 1.282140 | 1.554201 |
| C    | 1.581241 | 3.571381 | -0.51550  | H    | 3.491482 | -0.37439 | -2.08245 |
| C    | 0.985171 | 4.110087 | 0.635024  | H    | 1.854959 | 1.455627 | -2.20629 |
| C    | 0.060898 | 5.15694  | 0.582898  | H    | 5.72380  | -4.87294 | -2.75821 |
| C    | -0.28599 | 5.71393  | -0.666140 | H    | 7.035205 | -1.25834 | -4.63821 |
| C    | -2.84748 | 4.55340  | 1.040113  | H    | 9.135822 | -1.37186 | 2.812425 |
| C    | -3.39331 | 3.26561  | 1.038783  | H    | 5.251489 | -2.08758 | 4.461043 |
| C    | -4.28016 | 2.814836 | 0.047972  | H    | -6.77823 | 1.981196 | -0.6752  |
| C    | -4.62267 | 3.713933 | -0.97281  | H    | -7.68731 | -0.30171 | -0.63188 |

|   |          |          |           |   |          |          |          |
|---|----------|----------|-----------|---|----------|----------|----------|
| C | -4.08832 | 4.998607 | -0.98630  | H | -3.94745 | -1.76245 | 0.898692 |
| C | -3.19979 | 5.43965  | 0.000897  | H | -3.03329 | 0.517706 | 0.842606 |
| C | -1.23558 | 6.892304 | -0.82223  | H | -5.7773  | -5.11576 | 0.066859 |
| C | -2.61000 | 6.828227 | -0.08548  | H | -5.32367 | -6.59496 | 1.995631 |
| C | 2.553299 | 2.455056 | -0.42543  | H | -5.40166 | -5.69277 | 4.316543 |
| C | -4.83078 | 1.438645 | 0.081172  | H | -5.95582 | -3.29036 | 4.675298 |
| C | 3.476811 | 2.376001 | 0.632771  | H | -6.43918 | -1.82101 | 2.746265 |
| C | 4.375377 | 1.318243 | 0.719864  | H | -8.64519 | -3.97668 | 0.354974 |
| C | 4.422265 | 0.296207 | -0.25315  | H | -10.024  | -4.80746 | -1.52163 |
| C | 3.497175 | 0.395823 | -1.31537  | H | -9.39462 | -4.27923 | -3.87344 |
| C | 2.579119 | 1.437113 | -1.39633  | H | -7.35334 | -2.92084 | -4.316   |
| C | 5.805999 | -1.69961 | -1.47307  | H | -5.95874 | -2.11845 | -2.43841 |
| C | 6.089062 | -1.23452 | 1.2515    | B | 5.443346 | -0.89161 | -0.157   |
| C | 5.608626 | -3.10645 | -1.54553  | C | 8.447344 | -0.82342 | 0.309837 |
| C | 5.900964 | -3.79922 | -2.72276  | H | 8.325895 | -1.48594 | -0.55231 |
| C | 6.42017  | -3.15853 | -3.85144  | H | 8.285797 | 0.201363 | -0.04789 |
| C | 6.624923 | -1.78148 | -3.77556  | H | 9.488171 | -0.88811 | 0.642882 |
| C | 6.316868 | -1.04558 | -2.62444  | C | 3.787044 | -1.75127 | 2.29865  |
| C | 7.501299 | -1.1831  | 1.437866  | H | 3.289092 | -1.2695  | 3.148466 |
| C | 8.054947 | -1.43168 | 2.694243  | H | 3.35135  | -1.34382 | 1.385385 |
| C | 7.266789 | -1.75501 | 3.804712  | H | 3.528053 | -2.81784 | 2.341588 |
| C | 5.889074 | -1.82332 | 3.618329  | C | 7.89572  | -2.00893 | 5.154345 |
| C | 5.291293 | -1.56709 | 2.375803  | H | 8.727714 | -2.71974 | 5.081563 |
| C | -6.14122 | 1.16427  | -0.34749  | H | 8.301984 | -1.0846  | 5.585901 |
| C | -6.66445 | -0.12377 | -0.315300 | H | 7.168258 | -2.41337 | 5.865516 |
| C | -5.88478 | -1.20029 | 0.137666  | C | 5.045458 | -3.89764 | -0.38151 |
| C | -4.57161 | -0.94086 | 0.56191   | H | 5.685522 | -3.82955 | 0.50395  |
| C | -4.06325 | 0.353193 | 0.538623  | H | 4.051136 | -3.54111 | -0.08628 |
| N | -6.41066 | -2.51875 | 0.165793  | H | 4.946307 | -4.95557 | -0.64511 |
| C | -6.14057 | -3.36731 | 1.274389  | C | 6.772878 | -3.93847 | -5.09603 |
| C | -7.20747 | -2.99028 | -0.91302  | H | 6.03565  | -4.72334 | -5.29977 |
| C | -5.82268 | -4.72095 | 1.076872  | H | 6.827218 | -3.28775 | -5.9751  |
| C | -5.56839 | -5.54998 | 2.167783  | H | 7.748644 | -4.43247 | -4.99382 |
| C | -5.60754 | -5.04497 | 3.469213  | C | 6.572274 | 0.450629 | -2.679   |
| C | -5.91416 | -3.69715 | 3.668164  | H | 5.708294 | 0.988414 | -3.0887  |
| C | -6.18776 | -2.86443 | 2.584881  | H | 6.775153 | 0.886864 | -1.69844 |
| C | -8.3611  | -3.75314 | -0.66841  | H | 7.428777 | 0.669475 | -3.32644 |
| C | -9.13431 | -4.21881 | -1.7301   | C | -0.58273 | 5.641262 | 1.862982 |
| C | -8.78532 | -3.92017 | -3.04892  | C | -1.94048 | 4.948648 | 2.197824 |
| C | -7.64325 | -3.15506 | -3.29492  | H | -1.72263 | 4.036984 | 2.765001 |

|   |          |          |          |   |          |          |          |
|---|----------|----------|----------|---|----------|----------|----------|
| C | -6.85342 | -2.7002  | -2.24085 | H | 0.095833 | 5.455882 | 2.703951 |
| H | 0.053126 | 5.5945   | -2.78557 | H | -3.30206 | 7.484763 | -0.62612 |
| H | 1.674904 | 3.753756 | -2.6655  | H | -2.51946 | 7.256624 | 0.917259 |
| H | 1.228356 | 3.680972 | 1.604455 | H | -0.72868 | 7.818131 | -0.51123 |
| H | -3.13943 | 2.594303 | 1.855419 | H | -1.43257 | 7.008854 | -1.8938  |
| H | -5.2856  | 3.398031 | -1.77334 | H | -0.71343 | 6.726828 | 1.8232   |
| H | -4.35961 | 5.679377 | -1.7909  | H | -2.49043 | 5.60403  | 2.889568 |

**Table S12.** Coordinates (Å) for the optimized structure (B3LYP, 6-31G\*) of **M2**.

| atom | X        | Y        | Z        | atom | X        | Y        | Z        |
|------|----------|----------|----------|------|----------|----------|----------|
| C    | -3.5721  | 4.419388 | 1.166373 | H    | -7.14667 | 2.537407 | 1.307659 |
| C    | -4.50074 | 3.39336  | 1.25417  | H    | -8.79461 | 0.719905 | 1.419605 |
| C    | -4.65838 | 2.491011 | 0.189655 | H    | -6.11637 | -1.84214 | -0.75619 |
| C    | -3.83107 | 2.67266  | -0.92133 | H    | -4.44139 | -0.04585 | -0.80929 |
| C    | -2.85291 | 3.685181 | -1.01347 | H    | -8.73439 | -6.25418 | -0.46463 |
| C    | -2.73969 | 4.611285 | 0.048814 | H    | -5.97389 | -4.89137 | 2.539274 |
| C    | 0.339706 | 3.821368 | -1.46106 | H    | -12.9752 | -2.26935 | 1.473536 |
| C    | 1.383043 | 2.891286 | -1.34517 | H    | -11.9965 | 0.444439 | -1.71679 |
| C    | 2.431959 | 3.058118 | -0.43162 | H    | 5.082192 | 3.496919 | 0.02925  |
| C    | 2.426708 | 4.216859 | 0.364513 | H    | 6.870268 | 1.827561 | 0.259468 |
| C    | 1.416137 | 5.162784 | 0.231717 | H    | 4.040638 | -1.31282 | -0.51055 |
| C    | 0.363223 | 4.99048  | -0.67573 | H    | 2.23126  | 0.345614 | -0.63268 |
| C    | -1.90775 | 5.888395 | 0.090176 | H    | 6.530303 | -5.70973 | -0.13414 |
| C    | -0.69417 | 6.055556 | -0.8371  | H    | 6.000612 | -3.6545  | -3.85037 |
| C    | -5.65749 | 1.396391 | 0.23971  | H    | 11.45699 | -0.33127 | 0.549384 |
| C    | 3.51602  | 2.051804 | -0.31839 | H    | 9.004592 | 0.368221 | 3.986456 |
| C    | -6.90301 | 1.575081 | 0.866071 | C    | -2.05675 | 3.608224 | -2.26691 |
| C    | -7.8435  | 0.552509 | 0.924449 | C    | -0.72488 | 3.583565 | -2.45546 |
| C    | -7.57985 | -0.69559 | 0.336609 | H    | -0.37941 | 3.322483 | -3.45628 |
| C    | -6.34181 | -0.88393 | -0.29922 | H    | -2.66029 | 3.362882 | -3.14111 |
| C    | -5.40092 | 0.139653 | -0.33475 | H    | -0.25282 | 7.035098 | -0.61359 |
| C    | -8.12278 | -3.08107 | 0.613314 | H    | -1.02827 | 6.091467 | -1.8781  |
| C    | -9.92018 | -1.44896 | 0.20919  | H    | -2.58836 | 6.732617 | -0.10048 |
| C    | -8.6879  | -4.13631 | -0.12093 | H    | -1.56457 | 6.021221 | 1.124501 |
| C    | -8.2859  | -5.44995 | 0.112903 | B    | 6.759713 | -0.94748 | -0.00391 |
| C    | -7.30433 | -5.7341  | 1.064703 | N    | -8.53932 | -1.7401  | 0.386057 |
| C    | -6.73376 | -4.68575 | 1.789777 | H    | -9.59709 | -0.07124 | -1.41711 |
| C    | -7.14262 | -3.37069 | 1.576344 | H    | -10.5727 | -2.75843 | 1.792415 |
| C    | -10.8878 | -2.06341 | 1.020581 | H    | -13.7073 | -0.65676 | -0.27877 |
| C    | -12.2405 | -1.78411 | 0.836164 | H    | -6.70642 | -2.56116 | 2.152894 |

|   |          |          |          |   |          |          |          |
|---|----------|----------|----------|---|----------|----------|----------|
| C | -12.6524 | -0.87738 | -0.14282 | H | -9.44118 | -3.91939 | -0.87158 |
| C | -11.6918 | -0.25784 | -0.94515 | H | -6.98819 | -6.75862 | 1.239087 |
| C | -10.338  | -0.54483 | -0.78088 | C | 6.62784  | -0.12547 | 2.938231 |
| C | 4.843373 | 2.440632 | -0.06065 | H | 6.159893 | 0.859347 | 2.820461 |
| C | 5.856093 | 1.494128 | 0.05353  | H | 5.899884 | -0.86083 | 2.58583  |
| C | 5.610481 | 0.114369 | -0.11231 | H | 6.77572  | -0.29153 | 4.010891 |
| C | 4.2765   | -0.25937 | -0.38163 | C | 9.573139 | -1.02234 | -1.1892  |
| C | 3.252502 | 0.677945 | -0.46755 | H | 9.165604 | -2.01211 | -1.41549 |
| C | 6.585204 | -2.34021 | -0.74248 | H | 9.095119 | -0.3138  | -1.87735 |
| C | 8.054411 | -0.58875 | 0.838783 | H | 10.6414  | -1.03311 | -1.42812 |
| C | 6.6675   | -3.57004 | -0.03332 | C | 11.6058  | 0.450504 | 3.158674 |
| C | 6.480801 | -4.78274 | -0.70309 | H | 12.4685  | -0.165   | 2.879866 |
| C | 6.242282 | -4.84214 | -2.07833 | H | 11.88827 | 1.497901 | 2.985665 |
| C | 6.176759 | -3.63579 | -2.7759  | H | 11.43779 | 0.332332 | 4.234339 |
| C | 6.327508 | -2.39899 | -2.13833 | C | 6.91708  | -3.62242 | 1.460917 |
| C | 9.352675 | -0.63693 | 0.260012 | H | 7.850835 | -3.12315 | 1.736378 |
| C | 10.47533 | -0.29557 | 1.019152 | H | 6.113839 | -3.13538 | 2.027966 |
| C | 10.37802 | 0.076185 | 2.362527 | H | 6.973167 | -4.65943 | 1.807106 |
| C | 9.106461 | 0.102622 | 2.935239 | C | 6.22257  | -1.15711 | -3.00637 |
| C | 7.953814 | -0.20282 | 2.201931 | H | 5.210028 | -0.7369  | -2.98763 |
| H | -3.483   | 5.114883 | 1.998514 | H | 6.898189 | -0.35809 | -2.6888  |
| H | -5.09439 | 3.280114 | 2.156892 | H | 6.459695 | -1.39789 | -4.04827 |
| H | -3.94164 | 1.999869 | -1.76798 | C | 6.092439 | -6.16736 | -2.78751 |
| H | 1.377772 | 2.020785 | -1.9962  | H | 7.071471 | -6.60645 | -3.02292 |
| H | 3.213804 | 4.370636 | 1.097157 | H | 5.554386 | -6.89478 | -2.16934 |
| H | 1.445288 | 6.062601 | 0.842991 | H | 5.549485 | -6.0572  | -3.73218 |

**Table S13.** Coordinates (Å) for the optimized structure (B3LYP, 6-31G\*) of **3**.

| atom | X        | Y        | Z        | atom | X        | Y        | Z        |
|------|----------|----------|----------|------|----------|----------|----------|
| C    | -1.28806 | 5.133949 | 0.138039 | H    | 5.568833 | 3.851663 | 1.213552 |
| C    | -2.30964 | 4.211864 | 0.320222 | H    | 4.014553 | 5.713434 | 0.816226 |
| C    | -2.38578 | 3.065098 | -0.48895 | H    | -3.68558 | 1.653978 | -2.42972 |
| C    | -1.39976 | 2.898344 | -1.46913 | H    | -5.45147 | -0.02868 | -2.14063 |
| C    | -0.34002 | 3.802066 | -1.64256 | H    | -5.39618 | 0.637883 | 2.103884 |
| C    | -0.27715 | 4.947643 | -0.82181 | H    | -3.55662 | 2.243475 | 1.828913 |
| C    | 2.866161 | 3.593097 | -1.5798  | H    | -8.72304 | -2.60119 | 4.167008 |
| C    | 3.795155 | 2.562154 | -1.37129 | H    | -9.78204 | 1.387093 | 3.033853 |
| C    | 4.773269 | 2.611499 | -0.36939 | H    | -9.16664 | -3.33367 | -3.10773 |
| C    | 4.83234  | 3.774023 | 0.418885 | H    | -5.12655 | -4.55956 | -2.40689 |
| C    | 3.943673 | 4.818285 | 0.202667 | H    | 7.414827 | 2.734743 | 0.316132 |



|   |          |           |          |   |          |          |          |
|---|----------|-----------|----------|---|----------|----------|----------|
| C | 2.934008 | 4.74914   | -0.77387 | H | 8.977648 | 0.872928 | 0.663732 |
| C | 0.731058 | 6.02091   | -0.95993 | H | 5.844602 | -1.92654 | -0.24311 |
| C | 2.070705 | 5.937916  | -0.9393  | H | 4.280172 | -0.06387 | -0.58593 |
| C | -3.47831 | 2.076265  | -0.32221 | H | 8.604325 | -4.30138 | 1.186117 |
| C | 5.71812  | 1.489143  | -0.16383 | H | 8.556386 | -6.27684 | -0.30094 |
| C | -4.03717 | 1.413328  | -1.4301  | H | 8.290332 | -5.99023 | -2.76129 |
| C | -5.04793 | 0.472662  | -1.26441 | H | 8.091465 | -3.69536 | -3.70992 |
| C | -5.57845 | 0.162352  | 0.00588  | H | 8.172728 | -1.72049 | -2.22317 |
| C | -5.02034 | 0.848167  | 1.105559 | H | 10.9989  | -2.46867 | 0.316174 |
| C | -3.98931 | 1.769334  | 0.952066 | H | 12.63983 | -2.40231 | 2.165364 |
| C | -7.66553 | -0.79542  | 1.456426 | H | 11.9666  | -1.56186 | 4.411848 |
| C | -6.88561 | -2.03069  | -0.91112 | H | 9.622141 | -0.80519 | 4.781391 |
| C | -7.81548 | -1.88338  | 2.358722 | H | 7.975726 | -0.90195 | 2.938789 |
| C | -8.63336 | -1.75637  | 3.486179 | B | -6.7224  | -0.89658 | 0.185422 |
| C | -9.34674 | -0.58747  | 3.757903 | C | -9.32146 | -1.34334 | -1.35665 |
| C | -9.21789 | 0.472236  | 2.858505 | H | -9.60103 | -1.32347 | -0.29944 |
| C | -8.3874  | 0.397235  | 1.735322 | H | -9.14112 | -0.30425 | -1.66113 |
| C | -8.11053 | -2.21981  | -1.60723 | H | -10.1836 | -1.70077 | -1.92877 |
| C | -8.22009 | -3.21531  | -2.58285 | C | -4.44959 | -2.80027 | -0.55055 |
| C | -7.15894 | -4.06791  | -2.8954  | H | -3.81453 | -2.03655 | -1.01439 |
| C | -5.96282 | -3.89419  | -2.19789 | H | -4.5256  | -2.54188 | 0.50954  |
| C | -5.80254 | -2.89215  | -1.23441 | H | -3.91989 | -3.75631 | -0.62169 |
| C | 7.054127 | 1.715275  | 0.210482 | C | -7.29807 | -5.12851 | -3.96168 |
| C | 7.945858 | 0.66554   | 0.398888 | H | -8.31328 | -5.53968 | -3.98878 |
| C | 7.527828 | -0.66599  | 0.236827 | H | -7.08873 | -4.71958 | -4.95959 |
| C | 6.192841 | -0.90496  | -0.12978 | H | -6.60023 | -5.95653 | -3.79757 |
| C | 5.31417  | 0.153251  | -0.33247 | C | -7.08396 | -3.19708 | 2.167295 |
| N | 8.430433 | -1.74061  | 0.438898 | H | -7.27854 | -3.6345  | 1.183929 |
| C | 8.391671 | -2.87642  | -0.41704 | H | -5.99685 | -3.07532 | 2.255404 |
| C | 9.375575 | -1.68981  | 1.501078 | H | -7.38859 | -3.92341 | 2.927589 |
| C | 8.499287 | -4.17192  | 0.113621 | C | -10.214  | -0.4681  | 4.988625 |
| C | 8.471848 | -5.28142  | -0.7292  | H | -9.64585 | -0.06483 | 5.838071 |
| C | 8.318664 | -5.12272  | -2.10815 | H | -11.0617 | 0.204679 | 4.818773 |
| C | 8.202868 | -3.83572  | -2.63785 | H | -10.6093 | -1.44191 | 5.297307 |
| C | 8.248094 | -2.71927  | -1.80502 | C | -8.32798 | 1.619957 | 0.836361 |
| C | 10.6993  | -2.11118  | 1.296219 | H | -7.44996 | 2.238834 | 1.054124 |
| C | 11.61949 | -2.0720   | 2.342067 | H | -8.27493 | 1.364082 | -0.22583 |
| C | 11.24481 | -1.59743  | 3.600842 | H | -9.21578 | 2.244314 | 0.982653 |
| C | 9.931239 | -1.169600 | 3.805117 | C | 0.601539 | 3.524069 | -2.75155 |
| C | 8.999074 | -1.22207  | 2.770534 | C | 1.939001 | 3.435253 | -2.72426 |

|   |          |          |          |   |          |          |          |
|---|----------|----------|----------|---|----------|----------|----------|
| H | -1.26492 | 6.031506 | 0.751565 | H | 2.612104 | 6.884653 | -0.95159 |
| H | -3.07743 | 4.400944 | 1.064806 | H | 0.309901 | 7.026574 | -0.98745 |
| H | -1.43316 | 2.019700 | -2.10806 | H | 2.422773 | 3.120949 | -3.64975 |
| H | 3.763108 | 1.701355 | -2.03448 | H | 0.117816 | 3.273819 | -3.69636 |

### References:

[3] M. J. Frisch, G. W. Trucks, H. B. Schlegel, G. E. Scuseria, M. A. Robb, J. R. Cheeseman, G. Scalmani, V. Barone, B. Mennucci, G. A. H. Petersson, M. Nakatsuji, X. Caricato, H. P. F. Li, A. Hratchian, J. Izmaylov, G. Bloino, J. L. Zheng, M. Sonnenberg, M. Hada, K. Ehara, R. Toyota, J. Fukuda, M. Hasegawa, T. Ishida, Y. Nakajima, O. Honda, H. Kitao, T. Nakai, J. A. Vreven, J. E. Montgomery Jr., F. Peralta, M. Ogliaro, J. J. Bearpark, E. Heyd, K. N. Brothers, V. N. Kudin, T. Staroverov, R. Keith, J. Kobayashi, K. Normand, A. Raghavachari, J. C. Rendell, S. S. Burant, J. Iyengar, M. Tomasi, N. Cossi, J. M. Rega, M. Millam, J. E. Klene, J. B. Knox, V. Cross, C. Bakken, J. Adamo, R. Jaramillo, R. E. Gomperts, O. Stratmann, A. J. Yazyev, R. Austin, C. Cammi, J. W. Pomelli, R. L. Ochterski, K. Martin, V. G. Morokuma, G. A. Zakrzewski, P. Voth, J. J. Salvador, S. Dannenberg, A. D. Dapprich, O. Daniels, J. B. Farkas, J. V. Foresman, J. Ortiz, J. Cioslowski, D. J. Fox, Gaussian 09 Revision C.01, 2010.

[4] (a) C. Lee, W. Yang, R. G. Parr, *Phys. Rev. B*, **1988**, *37*, 785–789. (b) A. D. Becke, *J. Chem. Phys.* **1993**, *98*, 1372–1377. (c) A. D. Becke, *J. Chem. Phys.* **1993**, *98*, 5648–5652.

[5] (a) R. Ditchfield, W. J. Hehre, J. A. Pople, *J. Chem. Phys.* **1971**, *54*, 724–728. (b) A. D. McLean, G. S. Chandler, *J. Chem. Phys.* **1980**, *72*, 5639–5648.
